# Supplementary material for: Sialic acid linkage differentiation of glycopeptides using capillary electrophoresis – electrospray ionization – mass spectrometry
Source: PubMed Central journal article supplement (PMC5473812; doi:10.1038/s41598-017-03838-y), 2017-06-16
Supplement: 41598_2017_3838_MOESM1_ESM.pdf [file 41598_2017_3838_MOESM1_ESM.pdf]

# Sialic acid linkage differentiation of glycopeptides using capillary electrophoresis – electrospray ionization – mass spectrometry

Guinevere S.M. Kammeijer<sup>1\*</sup>, Bas C. Jansen<sup>1</sup>, Isabelle Kohler<sup>1</sup>, Anthonius A.M. Heemskerk<sup>1,2</sup>, Oleg A. Mayboroda<sup>1</sup>, Paul J. Hensbergen<sup>1</sup>, Julie Schappler<sup>3</sup>, Manfred Wuhrer<sup>1</sup>

<sup>1</sup> Leiden University Medical Center, Center for Proteomics and Metabolomics, Leiden, The Netherlands

<sup>2</sup> University of Applied Sciences Leiden, Leiden, The Netherlands

<sup>3</sup> University of Geneva, University of Lausanne, School of Pharmaceutical Sciences, Geneva, Switzerland

\* **Correspondence:** Guinevere S.M. Kammeijer, Leiden University Medical Center, Center for Proteomics and Metabolomics, P.O. Box 9600, 2300 RC Leiden, The Netherlands; g.s.m.kammeijer@lumc.nl; Tel: +31-71-52-69384

## TABLE OF CONTENTS

|             |                                                                                                                                                               |               |
|-------------|---------------------------------------------------------------------------------------------------------------------------------------------------------------|---------------|
| <b>S-1</b>  | <b>SUPPLEMENTARY INFORMATION – RESULTS AND DISCUSSION</b> .....                                                                                               | <b>ii</b>     |
|             | S-1.1. <i>In silico</i> prediction .....                                                                                                                      | ii            |
|             | S-1.2. Experimental determination of absolute pK <sub>a</sub> values .....                                                                                    | ii            |
| <b>S-2.</b> | <b>SUPPLEMENTARY INFORMATION – THEORY</b> .....                                                                                                               | <b>iii</b>    |
|             | S-2.1. Theory behind the experimental determination of the absolute pK <sub>a</sub> values by a conventional CE approach .....                                | iii           |
|             | S-2.2. Theory behind the experimental determination of the relative pK <sub>a</sub> values by internal standard CE (IS-CE) approach.....                      | v             |
| <b>S-3.</b> | <b>SUPPLEMENTARY INFORMATION – EXPERIMENTAL SECTION DETERMINATION OF THE PK<sub>A</sub> VALUES OF A-2,3 SIALYLLACTOSE AND A-2,6 SIALYLLACTOSE BY CE</b> ..... | <b>vi</b>     |
|             | S-3.1. Buffers for experimental determination of absolute pK <sub>a</sub> values .....                                                                        | vi            |
|             | S-3.2. Prediction of pK <sub>a</sub> values by an <i>in silico</i> approach .....                                                                             | vi            |
|             | S-3.3. Experimental determination of absolute pK <sub>a</sub> values .....                                                                                    | vi            |
| <b>S-4.</b> | <b>SUPPLEMENTARY INFORMATION – ALIGNMENT PROGRAM</b> .....                                                                                                    | <b>vii</b>    |
| <b>S-5.</b> | <b>SUPPLEMENTARY INFORMATION – EIC EXTRACTOR PROGRAM</b> .....                                                                                                | <b>xi</b>     |
| <b>S-6</b>  | <b>SUPPLEMENTARY INFORMATION – TABLES S-1 – S-3</b> .....                                                                                                     | <b>xiv</b>    |
| <b>S-7</b>  | <b>SUPPLEMENTARY INFORMATION – FIGURES S-1 – S-10</b> .....                                                                                                   | <b>xviii</b>  |
| <b>S-8</b>  | <b>REFERENCES</b> .....                                                                                                                                       | <b>xxviii</b> |

## S-1 SUPPLEMENTARY INFORMATION – RESULTS AND DISCUSSION

### S-1.1. *IN SILICO* PREDICTION

As illustrated in Figure S-8.A, Supporting Information,  $\alpha$ 2,3-sialyllactose possesses two acidic functions. The predicted  $pK_a$  values were  $12.0 \pm 0.7$  (moiety highlighted in green) and  $1.9 \pm 0.7$  (moiety highlighted in yellow). Regarding  $\alpha$ 2,6-sialyllactose (Figure S-8.B, Supporting Information), the predicted  $pK_a$  values of the two acidic functions were  $12.0 \pm 0.7$  (moiety highlighted in green) and  $2.0 \pm 0.7$  (moiety highlighted in yellow). These results suggested that a slight difference may exist between the two isomers in the  $pK_a$  values for one of the acidic functions, but this difference is not significant due to the relatively large error associated with the prediction.

### S-1.2. EXPERIMENTAL DETERMINATION OF ABSOLUTE $pK_a$ VALUES

As detailed in section S-2 of the Supporting Information,  $pK_a$  values can be experimentally determined using CE since the effective mobility ( $\mu_{eff}$ ) of an analyte directly depends on its charge state ( $\mu = q/r$ ) which will differ according to the pH of the solution. By plotting the  $\mu_{eff}$  measured for both analytes in the different BGEs as a function of pH, a sigmoidal curve is traced, allowing for the practical determination of the  $pK_a$  using nonlinear regression.<sup>1</sup> An example of the electropherograms are shown in Figure S-9, Supporting Information for each compound analyzed with the neutral marker at pH 2 and 6. The graphical relationship between  $\mu_{eff}$  and pH observed for  $\alpha$ 2,3-sialyllactose and  $\alpha$ 2,6-sialyllactose are shown in Figure S-10A and S-10B, Supporting Information, an overlay of the two compounds is illustrated in Figure S-10C. The curves of both compounds exhibited two distinct inflection points, namely, between pH 1.5 and 3.5, as well as between pH 10.0 and 12.0, corresponding to two dissociation constants. It is worth mentioning that both compounds presented a difference in effective mobility at certain pH values (e.g.,  $\Delta\mu_{eff} = 4.9 \cdot 10^{-6}$  at pH 2.0 and  $\Delta\mu_{eff} = 3.9 \cdot 10^{-6}$  at pH 6.0). The  $pK_a$  values of both compounds were determined using the appropriate fitting model for diacidic compounds (Eq. S-3). The  $pK_a$  values of  $\alpha$ 2,3-sialyllactose were estimated at  $11.7 \pm 0.8$  and  $1.8 \pm 0.1$ . The  $pK_a$  values of  $\alpha$ 2,6-sialyllactose were estimated at  $11.6 \pm 1.2$  and  $1.8 \pm 0.1$ . The determined  $pK_a$  value of  $\alpha$ 2,3-sialyllactose and  $\alpha$ 2,6-sialyllactose expressed an overlapping 95 % confidence interval revealing no statistical differences in the determined  $pK_a$  values. However this was to be expected as 95 % confidence intervals are typically higher at the limit of the investigated pH range.

## S-2. SUPPLEMENTARY INFORMATION – THEORY

### S-2.1. THEORY BEHIND THE EXPERIMENTAL DETERMINATION OF THE ABSOLUTE $pK_a$ VALUES BY A CONVENTIONAL CE APPROACH

The  $i^{th}$  dissociation of a fully protonated polyprotic solute  $H_nX^z$  is described as follow:

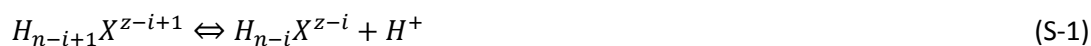

Where  $n$  is the total number of ionizable groups and  $z$  the charge of the fully protonated species. For measurements performed in non-ideal solutions, the thermodynamic dissociation constant of the  $i^{th}$  dissociation step is defined as:

$$K_{ai}(thermodynamic) = \frac{[H_{n-i}X^{z-i}]}{[H_{n-i+1}X^{z-i+1}]} \cdot \frac{\gamma^{z-i}}{\gamma^{z-i+1}} \cdot a_{H^+} \quad (S-2)$$

Where  $a_{H^+}$  is the proton activity, terms in brackets represent molar concentrations of the electrical species of the solute and  $\gamma$  terms are the activity coefficients of charged species other than proton.

The effective mobility ( $\mu_{eff}$ ) of a polyprotic compound  $H_nX^z$ , coexisting in different ionized states at a given pH, depends on the molar fraction ( $\chi_j$ ) and on the effective mobility of each individual species:

$$\mu_{eff} = \sum_{i=0}^n \chi_{H_{n-i}X^{z-i}} \cdot \mu_{H_{n-i}X^{z-i}} \quad (S-3)$$

Therefore,

$$\mu_{eff} = \sum_{i=0}^n \frac{[H_{n-i}X^{z-i}]}{\sum_{i=0}^n [H_{n-i}X^{z-i}]} \cdot \mu_{H_{n-i}X^{z-i}} \quad (S-4)$$

Using Eq. S-2, the previous equation can be rewritten as:

$$\mu_{eff} = \sum_{i=0}^n \frac{[\prod_{j=1}^i K_{aj}] \cdot a_{H^+}^{n-i}}{\sum_{i=0}^n [\prod_{j=1}^i K_{aj}] \cdot a_{H^+}^{n-i}} \cdot \mu_{H_{n-i}X^{z-i}} \quad (S-5)$$

Considering  $K_{aj} = 10^{-pK_{aj}}$  and  $a_{H^+}^n = 10^{-npH}$ , Eq. S-5 can be rearranged as a function of  $pH$  and  $-pK_{aj}$ :

$$\mu_{eff} = \sum_{i=0}^n \frac{\left[ \prod_{j=1}^i 10^{-pK_{aj}} \right] \cdot 10^{(i-n)pH}}{\sum_{i=0}^n \left[ \prod_{j=1}^i 10^{-pK_{aj}} \right] \cdot 10^{(i-n)pH}} \cdot \mu_{H_{n-i}X^{z-i}} \quad (S-6)$$

This equation allows the determination of  $pK_a$  values from a plot of  $\mu_{eff}$  as a function of  $pH$ .

Practically,  $\mu_{eff}$  ( $cm^2 \cdot V^{-1} \cdot s^{-1}$ ) of an analyte can be measured as:

$$\mu_{eff} = \frac{L_{eff} \cdot L_{tot}}{U} \cdot \left( \frac{1}{t_m} - \frac{1}{t_{EOF}} \right) \quad (S-7)$$

Where,  $t_m$  is the migration time of the analyte,  $t_{EOF}$  the migration time of acetone, used as the EOF marker.  $U$  is the applied voltage ( $V$ ),  $L_{tot}$  the total capillary length ( $cm$ ) and  $L_{eff}$  the effective capillary length ( $cm$ ).

## S-2.2. THEORY BEHIND THE EXPERIMENTAL DETERMINATION OF THE RELATIVE $pK_a$ VALUES BY INTERNAL STANDARD CE (IS-CE) APPROACH

Considering both analogs, two different expressions for Eq. S-6 can be defined, one for the first analyte ( $\alpha_{2,3}$ ) and the other for the other analyte ( $\alpha_{2,6}$ ). If both equations are subtracted and rearranged, Eq. S-8 is obtained:

$$\Delta pK_a = pK_{a_{\alpha_{2,3}}} - pK_{a_{\alpha_{2,6}}} = \log Q_{\alpha_{2,3}} - \log Q_{\alpha_{2,6}} \quad (\text{S-8})$$

Where  $Q$  is a quotient that involves the limiting mobility (i.e., of the fully deprotonated form,  $\mu_{A^-}$ , obtained at pH 6.0) of the acid and its effective mobility (i.e., the mobility at a pH where the ionized and the neutral form of the acid coexist,  $\mu_{eff}$ , obtained at pH 2.0):

$$Q = \frac{\mu_{A^-} - \mu_{eff}}{\mu_{eff}} \quad (\text{S-9})$$

The mobility values are directly calculated from the migration times of the analyte and the EOF marker,  $t_m$  and  $t_{EOF}$ , respectively, by Eq. S-7.

As illustrated in Eq. S-8, the pH term is absent indicating that the equation is therefore also pH independent. Since, both Eq. S-8 and S-9 are pH independent, the limiting and effective mobilities of both analytes are the only parameters to be determined (Eq. S-9).<sup>2</sup> This means that both compounds have to be injected together in a buffer at a pH where they are totally ionized in order to determine  $\mu_{A^-}$ , and in a buffer at a pH where they are only partially ionized to obtain the  $\mu_{eff}$ , which was obtained at pH 6 and 2, respectively. For both cases, a phosphate buffer at the same ionic strength was used (Table S-2, Supporting Information). As mentioned above, the pH of the buffer was less critical than with the conventional approach since the pH values of both buffers do not need to be precisely measured.

### S-3. SUPPLEMENTARY INFORMATION – EXPERIMENTAL SECTION DETERMINATION OF THE pK<sub>a</sub> VALUES OF α-2,3 SIALYLLACTOSE AND α-2,6 SIALYLLACTOSE BY CE

#### S-3.1. BUFFERS FOR EXPERIMENTAL DETERMINATION OF ABSOLUTE pK<sub>a</sub> VALUES

Twenty-two buffers covering a pH range from pH 1.5 to 12.0 were prepared. All buffers were set at a constant ionic strength of 50 mM to avoid variations in effective mobility and keep the activity coefficients constant (Table S-1, Supporting Information). The nature of the buffers was carefully selected to ensure the best buffer capacity as well as minimal interactions with the analytes. The pH values were measured with a Mettler-Toledo SevenMulti pH meter (Schwerzenbach, Switzerland), daily calibrated with four aqueous solutions at pH 2.00, 4.00, 7.00, and 10.00 from Riedel-de-Haën (Buchs, Switzerland). Samples were set at a concentration of 0.5 mg/mL in MQ water and acetone 95:5 (v/v). Acetone was used as a marker of the electroosmotic flow (EOF).

#### S-3.2. PREDICTION OF pK<sub>a</sub> VALUES BY AN *IN SILICO* APPROACH

Prediction of the pK<sub>a</sub> values of α2,3-sialyllactose and α2,6-sialyllactose was performed with ACD/Labs software version 12.01 (Advanced Chemistry Development, Inc., Toronto, ON, Canada). The prediction did not include the influence of the intramolecular hydrogen bonds which may impact the estimated pK<sub>a</sub> values. Estimation of the error associated to the predicted values was also reported.

#### S-3.3. EXPERIMENTAL DETERMINATION OF ABSOLUTE pK<sub>a</sub> VALUES

Absolute pK<sub>a</sub> values were determined using a procedure developed by Geiser *et al.*<sup>1</sup>. Briefly, each sample was injected once at each pH. The effective mobility ( $\mu_{eff}$ ) was calculated from the migration times of the analyte and the neutral marker using Eq. S-7.

Calculated effective mobilities were reported as a function of pH, giving rise to sigmoidal curves. With a GraphPad Prism 6.01 software (GraphPad Software, San Diego, CA, USA), non-linear regressions were performed to determine apparent pK<sub>a</sub> values at I=50 mM with Eq. S-10 used for diacidic compounds ( $N = 2, z = 0$ ).

$$\mu_{eff} = \frac{\mu_{HX} \frac{10^{-pK_{a1}-pH}}{10^{-2pH} + 10^{-pK_{a1}-pH} + 10^{-pK_{a2}-pK_{a1}}} + \mu_{X^{2-}} \frac{10^{-pK_{a2}-pK_{a1}}}{10^{-pK_{a1}-pH} + 10^{-pK_{a2}-pK_{a1}}}}{10^{-2pH} + 10^{-pK_{a1}-pH} + 10^{-pK_{a2}-pK_{a1}}} \quad (S-10)$$

#### S-4. SUPPLEMENTARY INFORMATION – ALIGNMENT PROGRAM

For the use of the alignment program a mzML file needs to be created of the generated MS file. Furthermore an alignment file (.txt) needs to be provided that holds the information regarding which  $m/z$  feature needs to be used and the desired migration time ( $t_m$ ). While running the program the time tolerance should be specified (sec) as well the  $m/z$  tolerance.

```
#!/usr/bin/env python
import base64
import glob
import matplotlib.pyplot as plt
import numpy
from scipy.interpolate import splrep
import struct
import sys
import zlib

def decoder(string,precision,compressed):
    """ processes a string and returns an array.
    """
    if not string:
        return []
    if precision == 64:
        precision = 'd'
    else:
        precision = 'f'
    data = base64.b64decode(string)
    if compressed == 1:
        data = zlib.decompress(data)
    count = len(data) / struct.calcsize('<' + precision)
    result = struct.unpack('<' + precision * count, data[0:len(data)])
    return result

def feature_reader(file):
    """ reads the contents of the 'features.txt' file and stores
    the relevant values in a list.
    """
    features = []
    with open(file,'r') as fr:
        for line in fr:
            if line[0][0].isdigit():
                line = line.rstrip().split()
                features.append(line)
            else:
                continue
    return features

def targeted_mzML_reader(file,targetMass,targetTime,massTol,timeTol):
    """ reads the contents of an input mzML. The function also
    hands chunks over to the processing function.
    """
```

```
with open(file,'r') as fr:
    # switch to keep track if we are at m/z or intensity binary data
    switch = 0
    peakIntensity = 0
    peakTime = 0
    # default value for decoding/uncompress
    compression = 0
    precision = 32
    for line in fr:
        if 'zlib compression' in line:
            compression = 1
        if '64-bit' in line:
            precision = 64
        if '<spectrumList count=\'' in line:
            number = line.split(" ")
            for x in number:
                if 'count' in x:
                    number = x.split("\\")[1]
        if 'scan start time' in line:
            time = line.split(" ")
            for x in time:
                if 'value' in x:
                    time = x.split("\\")[1]
        if '<spectrum index=\'' in line:
            index = line.split(" ")
            for x in index:
                if 'index' in x:
                    index = x.split("\\")[1]
        if 'ms level' in line:
            level = line.split(" ")
            for x in level:
                if 'value' in x:
                    level = x.split("\\")[1]
        if 'isolation window target m/z' in line and int(level) == 2:
            precursor = line.split(" ")
            for x in precursor:
                if 'value' in x:
                    precursor = x.split("\\")[1]
        if '<binary>' in line:
            if float(time) > float(targetTime) - timeTol and float(time) < float(targetTime) + timeTol:
                if switch == 0:
                    mz_array = line.split("<binary>")[1]
                    mz_array = mz_array.split("<binary>")[0]
                    mz_array = decoder(mz_array,precision,compression)
                    #precision = 32 # Reset to default precision [6-2-2014]
                    switch = 1
                elif switch == 1:
                    int_array = line.split("<binary>")[1]
                    int_array = int_array.split("<binary>")[0]
                    int_array = decoder(int_array,precision,compression)
                    switch = 0
```



```
        data = zip(mz_array,int_array)
        if feature_finder(data,float(targetMass)- massTol,float(targetMass)+massTol)
> peakIntensity:peakIntensity = feature_finder(data,float(targetMass)-
        massTol,float(targetMass)+massTol)
        peakTime = time
    return (peakTime,peakIntensity)

def feature_finder(data,lowMass,highMass):
    """Reads the current spectrum and returns the maximum
    intensity of searched feature"""
    intensity = 0
    for i in data:
        if i[0] > lowMass and i[0] < highMass:
            if i[1] > intensity:
                intensity = i[1]
    return intensity

def pair_plot(data,file):
    """Plots the set of timepoints (expected and observed) to
    visualize how well the alignment would fit.
    """
    output = file.split(",")[0]+".png"
    expected = []
    observed = []
    for i in data:
        expected.append(i[0])
        observed.append(i[1])
    # The following lines are for the spline (once I figure it out)
    # The following lines are for the Numpy.Polyfit
    z = numpy.polyfit(observed,expected,2)
    f = numpy.poly1d(z)
    x_new = numpy.linspace(expected[0],expected[-1],50)
    y_new = f(x_new)
    plt.figure()
    plt.scatter(expected,observed,marker='o')
    plt.plot(x_new,y_new,color='red')
    plt.xlabel('Expected RT')
    plt.ylabel('Observed RT')
    plt.savefig(output)
    #plt.show()
    return f

def transform_mzML(file,polynomial):
    """Reads the mzML file and transforms the reported retention
    time by the specified polynomial function.
    """
    with open (file,'r') as fr:
        output = "aligned_"+str(file)
        print "Writing output file: "+output
        with open(output,'w') as fw:
            for line in fr:
```

```
    if 'scan start time' in line:
        time = line.split(" ")
        # Get 'current' time
        for x in time:
            if 'value' in x:
                time = x.split("\\")[1]
        # Calculate 'aligned' time
        newTime = str(polynomial(float(time)))
        #if float(time) > 2250.0 and float(time) < 2300.0:
            #print time, newTime
        line = line.replace(time,newTime)
        fw.write(line)
    else:
        fw.write(line)
def main():
    timeTol = float(raw_input("Please specify the time tolerance in seconds?\n"))
    massTol = float(raw_input("Please specify the m/z tolerance?\n"))
    features = feature_reader('features.txt')
    for file in glob.glob("*.mzML"):
        timePairs = []
        print "Processing file: "+str(file)
        retTime = 0
        for i in features:
            print "- Feature: "+str(i)
            results = targeted_mzML_reader(file,i[0],i[1],massTol,timeTol)
            #print results # Enable this line for 'logging' purposes
            timePairs.append((float(i[1]),float(results[0])))
        polynomial = pair_plot(timePairs,file)
        transform_mzML(file,polynomial)

if __name__ == "__main__":
    """ Main program
    """
    main()
```

## S-5. SUPPLEMENTARY INFORMATION – EIC EXTRACTOR PROGRAM

After usage of the alignment program the generated mzXML file can be used to extract ion electropherograms. While running the program the targeted  $m/z$  value needs to be specified and a corresponding color (b,g,r,c,m,y,k,w). After targeting all the desired  $m/z$  values, the  $m/z$  tolerance can be specified.

```
#!/usr/bin/env python
from matplotlib import font_manager
from scipy.optimize import curve_fit
import glob
import base64
import math
import matplotlib
import matplotlib.pyplot as plt
import numpy
import sys
import struct
import zlib

def decoder(string,precision,compressed):
    """ processes a string and returns an array.
    """
    if not string:
        return []
    if precision == 64:
        precision = 'd'
    else:
        precision = 'f'
    data = base64.b64decode(string)
    if compressed == 1:
        data = zlib.decompress(data)
    count = len(data) / struct.calcsize('<' + precision)
    result = struct.unpack('<' + precision * count, data[0:len(data)])
    return result

def mzML_reader(file,target,color,error):
    """ reads the contents of an input mzML.
    """
    points=[]
    with open(file,'r') as fr:
        num_ms1 = 0
        switch = 0
        # default value for decoding/uncompress
        compression = 0
        precision = 32
        for line in fr:
            # The following 2 'if statements' might be optimized
            if 'zlib compression' in line:
                compression = 1
            if '64-bit' in line:
```

```

precision = 64
if '<spectrumList count=\'' in line:
    number = line.split(" ")
    for x in number:
        if 'count' in x:
            number = x.split("\\")[1]
if 'scan start time' in line:
    time = line.split(" ")
    for x in time:
        if 'value' in x:
            time = x.split("\\")[1]
if '<spectrum index=\'' in line:
    index = line.split(" ")
    for x in index:
        if 'index' in x:
            index = x.split("\\")[1]
            # Simple progress indicator
            if int(index) % 100 == 0:
                print "Spectrum: "+index+" of total "+str(number)
if 'ms level' in line:
    level = line.split(" ")
    for x in level:
        if 'value' in x:
            level = x.split("\\")[1]
if 'isolation window target m/z' in line and int(level) == 2:
    precursor = line.split(" ")
    for x in precursor:
        if 'value' in x:
            precursor = x.split("\\")[1]
if '<binary>' in line:
    if switch == 0:
        mz_array = line.split("<binary>")[1]
        mz_array = mz_array.split("</binary>")[0]
        mz_array = decoder(mz_array,precision,compression)
        switch = 1
    elif switch == 1:
        int_array = line.split("<binary>")[1]
        int_array = int_array.split("</binary>")[0]
        int_array = decoder(int_array,precision,compression)
        switch = 0
if '</spectrum>' in line:
    data = zip(mz_array,int_array)
    if int(level) == 1:
        for peak in data:
            if peak[0] > target-error and peak[0] < target+error:
                points.append((file,target,color,time,peak[1]))

return points
def gaussFunction(x, *p):
    A, mu, sigma = p
    return A*numpy.exp(-(x-mu)**2/(2.*sigma**2))
def plotter(runs):

```

```
# Font parameters
font = {'family' : 'calibri',
        'size'   : '26'}
matplotlib.rc('font',**font)
# Determines the maximum intensity to get the order of magnitude
maxIntensity = 0
for i in runs:
    int_array = []
    for j in i:
        if abs(float(j[4])) > maxIntensity:
            maxIntensity = abs(float(j[4]))
orderMagnitude = math.floor(math.log(maxIntensity,10))
# Plot the data that was given to this function
for i in runs:
    time_array = []
    int_array = []
    for j in i:
        time_array.append(abs(float(j[3]))/60)
        int_array.append(abs(float(j[4]))/math.pow(10,orderMagnitude))
    y_av = movingaverage(int_array,10)
    #dataLabel = i[0][0].decode("utf-8").split(".")[0]+" - "+str(i[0][1])
    #plt.plot(time_array,y_av,label=dataLabel,color=i[0][2])
    plt.plot(time_array,y_av,linewidth=1.0,color=i[0][2])
    plt.xlabel('Time (min)')
    plt.ylabel('Intensity (10{\mathrm{^+}}+str(int(orderMagnitude))+}}$)')
    plt.xlim(30,55)
# plt.legend(loc=2)
plt.show()
def movingaverage(interval, window_size):
    window = numpy.ones(int(window_size))/float(window_size)
    return numpy.convolve(interval, window, 'same')
def main():
    runs = []
    targets = []
    target = 1
    while target != "":
        target = raw_input("Please enter target m/z or hit enter to stop\n")
        color = raw_input("Please select a color for this target (ie: b,g,r,c,m,y,k,w)\n")
        if target != "":
            targets.append((float(target),str(color)))
    print "Selected peaks are: "+str(targets)
    error = float(raw_input("Please enter tolerance\n"))
    for file in glob.glob("*.mzML"):
        for target in targets:
            runs.append(mzML_reader(file,target[0],target[1],error))
    plotter(runs)

if __name__ == "__main__":
    """ Main program
    """
    main()
```

## S-6 SUPPLEMENTARY INFORMATION – TABLES S-1 – S-3

**Table S-1. Theoretical and observed glycopeptide and glycan mass during the CE-ESI-MS and MALDI-TOF-MS analysis of PSA with the corresponding deviation and ppm error (<10). The “PEP” label illustrates the tryptic peptide sequence N<sub>69</sub>K to which the glycan is attached.**

| Glycan Species                       |                           | CESI-MS              |          |           |           |                      |          |           |           | MALDI-TOF-MS      |                     |          |           |           |        |
|--------------------------------------|---------------------------|----------------------|----------|-----------|-----------|----------------------|----------|-----------|-----------|-------------------|---------------------|----------|-----------|-----------|--------|
|                                      |                           | [M+2H] <sup>2+</sup> | Observed | deviation | PPM error | [M+3H] <sup>3+</sup> | Observed | deviation | PPM error | MS <sup>2</sup> * | [M+Na] <sup>+</sup> | Observed | deviation | PPM error |        |
| <b>Non-sialylated/ Non-sulphated</b> |                           |                      |          |           |           |                      |          |           |           |                   |                     |          |           |           |        |
| 1                                    | H3N3F1                    |                      | 751.809  | 751.810   | 0.001     | 1.08                 | 501.542  | ND        |           |                   |                     | 1282.45  | ND        |           |        |
| 2                                    | H4N3                      |                      | 759.807  | 759.806   | -0.001    | -1.77                | 506.874  | ND        |           |                   |                     | 1298.45  | ND        |           |        |
| 3                                    | H3N4                      |                      | 780.320  | 780.321   | 0.001     | 1.00                 | 520.549  | ND        |           |                   |                     | 1339.48  | ND        |           |        |
| 4                                    | H4N3F1                    |                      | 832.836  | 832.835   | -0.001    | -0.96                | 555.560  | ND        |           |                   |                     | 1444.51  | ND        |           |        |
| 5                                    | H3N4F1                    |                      | 853.349  | 853.348   | -0.001    | -1.61                | 569.235  | ND        |           |                   |                     | 1485.53  | ND        |           |        |
| 6                                    | H4N4                      |                      | 861.347  | 861.346   | -0.001    | -1.08                | 574.567  | ND        |           |                   |                     | 1501.53  | ND        |           |        |
| 7                                    | H4N4F1                    |                      | 934.375  | 934.375   | -0.001    | -0.63                | 623.253  | ND        |           |                   |                     | 1647.59  | ND        |           |        |
| 8                                    | H5N4                      |                      | 942.373  | 942.372   | -0.001    | -1.43                | 628.585  | ND        |           |                   |                     | 1663.58  | ND        |           |        |
| 9                                    | H4N5                      |                      | 962.886  | 962.887   | 0.001     | 0.71                 | 642.260  | ND        |           |                   |                     | 1704.61  | ND        |           |        |
| 10                                   | H5N4F1                    |                      | 1015.402 | 1015.401  | 0.000     | -0.49                | 677.271  | ND        |           |                   |                     | 1809.64  | 1809.64   | 0.00      | 2.21   |
| 11                                   | H5N5F2                    |                      | 1189.971 | 1189.971  | 0.001     | 0.64                 | 793.650  | 793.652   | 0.002     | 3.06              |                     | 2158.78  | ND        |           |        |
| <b>Monosialylated/ Sulphated</b>     |                           |                      |          |           |           |                      |          |           |           |                   |                     |          |           |           |        |
| 12                                   | H3N4F1 [SO <sub>3</sub> ] |                      | 893.327  | 893.326   | -0.001    | -1.01                | 595.888  | ND        |           |                   |                     | 1565.53  | ND        |           |        |
| 13                                   | H4N3S <sub>2,3</sub> 1    |                      | 905.355  | 905.353   | -0.001    | -1.50                | 603.906  | ND        |           |                   |                     | 1571.53  | 1571.51   | -0.02     | -15.27 |
| 14                                   | H4N3S <sub>2,6</sub> 1    |                      | 905.355  | 905.354   | -0.001    | -0.94                | 603.906  | ND        |           |                   | X                   | 1617.58  | 1617.56   | -0.02     | -10.51 |
| 15                                   | H3N5 [SO <sub>3</sub> ]   |                      | 921.838  | 921.837   | -0.001    | -0.98                | 614.895  | ND        |           |                   |                     | 1622.51  | ND        |           |        |
| 16                                   | H3N4S <sub>2,6</sub> 1    |                      | 925.868  | 925.867   | -0.001    | -1.33                | 617.581  | ND        |           |                   | X                   | 1658.60  | 1658.60   | 0.00      | -0.60  |
| 17                                   | H4N3F1S <sub>2,3</sub> 1  |                      | 978.384  | 978.382   | -0.001    | -1.44                | 652.592  | ND        |           |                   | X                   | 1717.59  | 1717.59   | 0.00      | 0.00   |
| 18                                   | H4N3F1S <sub>2,6</sub> 1  |                      | 978.384  | 978.382   | -0.001    | -1.34                | 652.592  | ND        |           |                   | X                   | 1763.63  | 1763.64   | 0.00      | 2.84   |
| 19                                   | H5N3S <sub>2,3</sub> 1    |                      | 986.381  | 986.381   | 0.000     | -0.47                | 657.923  | ND        |           |                   |                     | 1733.59  | ND        |           |        |
| 20                                   | H5N3S <sub>2,6</sub> 1    |                      | 986.381  | 986.381   | 0.000     | -0.27                | 657.923  | ND        |           |                   |                     | 1779.63  | 1779.64   | 0.01      | 3.93   |
| 21                                   | H3N4F1S <sub>2,6</sub> 1  |                      | 998.897  | 998.895   | -0.002    | -1.78                | 666.267  | ND        |           |                   | X                   | 1804.66  | 1804.66   | 0.00      | 0.55   |
| 22                                   | H4N4S <sub>2,3</sub> 1    |                      | 1006.894 | 1006.893  | -0.001    | -1.43                | 671.599  | 671.598   | -0.001    | -1.20             |                     | 1774.61  | 1774.62   | 0.01      | 3.38   |
| 23                                   | H4N4S <sub>2,6</sub> 1    |                      | 1006.894 | 1006.893  | -0.001    | -0.83                | 671.599  | 671.596   | -0.003    | -4.18             | X                   | 1820.66  | 1820.65   | 0.00      | -1.10  |
| 24                                   | H3N5S <sub>2,6</sub> 1    |                      | 1027.408 | 1027.406  | -0.001    | -1.28                | 685.274  | 685.272   | -0.003    | -4.12             | X                   | 1861.68  | 1861.69   | 0.01      | 3.76   |
| 25                                   | H5N3F1S <sub>2,3</sub> 1  |                      | 1059.410 | 1059.413  | 0.003     | 3.00                 | 706.609  | ND        |           |                   |                     | 1879.65  | ND        |           |        |
| 26                                   | H5N3F1S <sub>2,6</sub> 1  |                      | 1059.410 | 1059.413  | 0.003     | 3.00                 | 706.609  | ND        |           |                   |                     | 1925.69  | ND        |           |        |
| 27                                   | H4N5F1 [SO <sub>3</sub> ] |                      | 1075.894 | 1075.891  | -0.003    | -2.79                | 717.598  | ND        |           |                   |                     | 1930.62  | ND        |           |        |
| 28                                   | H4N4F1S <sub>2,3</sub> 1  |                      | 1079.923 | 1079.922  | -0.001    | -1.38                | 720.285  | 720.284   | -0.001    | -0.80             |                     | 1920.67  | 1920.66   | -0.01     | -7.29  |
| 29                                   | H4N4F1S <sub>2,6</sub> 1  |                      | 1079.923 | 1079.922  | -0.001    | -1.11                | 720.285  | 720.284   | -0.001    | -1.36             | X                   | 1966.71  | 1966.71   | 0.00      | -0.51  |
| 30                                   | H5N4S <sub>2,3</sub> 1    |                      | 1087.921 | 1087.919  | -0.002    | -1.52                | 725.616  | 725.615   | -0.001    | -1.54             |                     | 1936.67  | 1936.65   | -0.01     | -6.71  |
| 31                                   | H5N4S <sub>2,6</sub> 1    |                      | 1087.921 | 1087.919  | -0.001    | -1.15                | 725.616  | 725.615   | -0.001    | -1.54             | X                   | 1982.71  | 1982.71   | 0.00      | 1.97   |
| 32                                   | H3N5F1S <sub>2,6</sub> 1  |                      | 1100.436 | 1100.435  | -0.001    | -1.52                | 733.960  | 733.959   | -0.001    | -1.90             | X                   | 2007.74  | 2007.73   | -0.01     | -3.49  |
| 33                                   | H4N5S <sub>2,3</sub> 1    |                      | 1108.434 | 1108.433  | -0.001    | -0.93                | 739.292  | 739.291   | -0.001    | -0.85             |                     | 1977.69  | ND        |           |        |
| 34                                   | H4N5S <sub>2,6</sub> 1    |                      | 1108.434 | 1108.433  | -0.001    | -0.57                | 739.292  | ND        |           |                   |                     | 2023.74  | 2023.73   | -0.01     | -3.95  |
| 35                                   | H3N6S <sub>2,6</sub> 1    |                      | 1128.947 | 1128.946  | -0.001    | -0.71                | 752.967  | 752.967   | -0.001    | -1.26             |                     | 2064.76  | 2064.76   | -0.01     | -2.42  |

Supporting Information –  
Sialic acid linkage differentiation of glycopeptides using capillary electrophoresis – electrospray ionization – mass spectrometry

|                                                             |                                            |  |          |          |        |       |         |         |        |       |   |         |         |       |       |
|-------------------------------------------------------------|--------------------------------------------|--|----------|----------|--------|-------|---------|---------|--------|-------|---|---------|---------|-------|-------|
| 36                                                          | H6N3F1S <sub>2,3</sub> 1                   |  | 1140.436 | 1140.434 | -0.002 | -1.96 | 760.627 | 760.627 | 0.000  | 0.57  |   | 2041.70 | ND      |       |       |
| 37                                                          | H6N3F1S <sub>2,6</sub> 1                   |  | 1140.436 | 1140.437 | 0.000  | 0.15  | 760.627 | ND      |        |       |   | 2087.74 | ND      |       |       |
| 38                                                          | H5N4F1S <sub>2,3</sub> 1                   |  | 1160.950 | 1160.948 | -0.002 | -1.73 | 774.302 | 774.301 | -0.001 | -1.27 | X | 2082.72 | 2082.72 | 0.00  | -1.44 |
| 39                                                          | H5N4F1S <sub>2,6</sub> 1                   |  | 1160.950 | 1160.948 | -0.002 | -1.47 | 774.302 | 774.301 | -0.001 | -1.53 | X | 2128.77 | 2128.77 | 0.00  | 0.47  |
| 40                                                          | H4N5F1S <sub>2,3</sub> 1                   |  | 1181.463 | 1181.461 | -0.002 | -1.93 | 787.978 | 787.976 | -0.002 | -2.03 |   | 2123.75 | 2123.74 | -0.01 | -3.77 |
| 41                                                          | H4N5F1S <sub>2,6</sub> 1                   |  | 1181.463 | 1181.461 | -0.002 | -1.42 | 787.978 | 787.972 | -0.006 | -7.36 |   | 2169.79 | 2169.78 | -0.02 | -6.91 |
| 42                                                          | H3N6F1S <sub>2,6</sub> 1                   |  | 1201.976 | 1201.974 | -0.002 | -1.54 | 801.653 | 801.651 | -0.002 | -2.77 |   | 2210.82 | ND      |       |       |
| 43                                                          | H5N4F2S <sub>2,3</sub> 1                   |  | 1233.979 | 1233.978 | -0.001 | -0.86 | 822.988 | 822.987 | -0.002 | -1.89 |   | 2228.78 | ND      |       |       |
| 44                                                          | H5N4F2S <sub>2,6</sub> 1                   |  | 1233.979 | 1233.977 | -0.002 | -1.26 | 822.988 | 822.988 | -0.001 | -1.04 |   | 2274.82 | ND      |       |       |
| 45                                                          | H4N5F2S <sub>2,3</sub> 1                   |  | 1254.492 | 1254.490 | -0.002 | -1.22 | 836.664 | 836.662 | -0.002 | -2.35 |   | 2269.81 | ND      |       |       |
| 46                                                          | H4N5F2S <sub>2,6</sub> 1                   |  | 1254.492 | 1254.491 | -0.001 | -1.06 | 836.664 | 836.663 | -0.001 | -0.80 |   | 2315.85 | ND      |       |       |
| 47                                                          | H5N5F1S <sub>2,3</sub> 1                   |  | 1262.489 | 1262.488 | -0.002 | -1.34 | 841.996 | 841.995 | 0.000  | -0.48 |   | 2285.80 | ND      |       |       |
| 48                                                          | H5N5F1S <sub>2,6</sub> 1                   |  | 1262.489 | 1262.490 | 0.001  | 0.48  | 841.996 | 841.995 | -0.001 | -0.84 |   | 2331.85 | ND      |       |       |
| 49                                                          | H3N6F2S <sub>2,6</sub> 1                   |  | 1275.005 | 1275.004 | -0.001 | -0.79 | 850.339 | ND      |        |       |   | 2356.88 | ND      |       |       |
| 50                                                          | H5N5F2S <sub>2,3</sub> 1                   |  | 1335.518 | 1335.517 | -0.002 | -1.16 | 890.681 | 890.681 | -0.001 | -1.10 |   | 2431.86 | ND      |       |       |
| 51                                                          | H5N5F2S <sub>2,6</sub> 1                   |  | 1335.518 | 1335.517 | -0.001 | -1.08 | 890.681 | 890.681 | -0.001 | -1.10 |   | 2477.90 | ND      |       |       |
| <b>Di-sialylated/ Mono-sialylated with a sulphate group</b> |                                            |  |          |          |        |       |         |         |        |       |   |         |         |       |       |
| 52                                                          | H4N5F1S <sub>2,3</sub> 1[SO <sub>3</sub> ] |  | 1221.441 | 1221.441 | 0.000  | 0.00  | 814.630 | 814.630 | 0.000  | 0.37  |   | 1930.62 |         |       |       |
| 53                                                          | H4N5F1S <sub>2,6</sub> 1[SO <sub>3</sub> ] |  | 1221.441 | 1221.439 | -0.002 | -1.64 | 814.630 | 814.629 | -0.001 | -1.23 |   | 2249.75 |         |       |       |
| 54                                                          | H5N4S <sub>2,3</sub> 2                     |  | 1233.468 | 1233.467 | -0.001 | -1.02 | 822.648 | 822.647 | -0.001 | -1.36 |   | 2209.75 | 2209.74 | -0.01 | -6.34 |
| 55                                                          | H5N4S <sub>2,3</sub> 1S <sub>2,6</sub> 1   |  | 1233.468 | 1233.466 | -0.002 | -1.91 | 822.648 | 822.647 | -0.001 | -1.73 | X | 2255.79 | 2255.79 | -0.01 | -2.66 |
| 56                                                          | H5N4S <sub>2,6</sub> 2                     |  | 1233.468 | 1233.466 | -0.002 | -1.91 | 822.648 | 822.647 | -0.001 | -1.48 | X | 2301.83 | 2301.84 | 0.00  | 0.96  |
| 57                                                          | H4N5S <sub>2,3</sub> 1S <sub>2,6</sub> 1   |  | 1253.982 | 1253.980 | -0.002 | -1.54 | 836.324 | 836.323 | -0.001 | -1.48 |   | 2296.82 | 2296.81 | -0.01 | -3.27 |
| 58                                                          | H4N5S <sub>2,6</sub> 2                     |  | 1253.982 | 1253.980 | -0.002 | -1.22 | 836.324 | 836.322 | -0.001 | -1.60 | X | 2342.86 | 2342.86 | 0.00  | -0.60 |
| 59                                                          | H3N6S <sub>2,6</sub> 2                     |  | 1274.495 | 1274.491 | -0.004 | -3.38 | 849.999 | 849.998 | -0.001 | -1.24 |   | 2383.89 | 2383.87 | -0.02 | -7.55 |
| 60                                                          | H5N4F1S <sub>2,3</sub> 2                   |  | 1306.497 | 1306.495 | -0.003 | -2.08 | 871.334 | 871.333 | -0.001 | -1.59 | X | 2447.89 | 2447.89 | 0.00  | -1.51 |
| 61                                                          | H5N4F1S <sub>2,3</sub> 1S <sub>2,6</sub> 1 |  | 1306.497 | 1306.494 | -0.003 | -2.61 | 871.334 | 871.333 | -0.001 | -1.02 | X | 2401.85 | 2401.86 | 0.00  | 1.67  |
| 62                                                          | H5N4F1S <sub>2,6</sub> 2                   |  | 1306.497 | 1306.495 | -0.002 | -1.69 | 871.334 | 871.333 | -0.001 | -1.48 | X | 2355.81 | 2355.81 | 0.00  | 1.27  |
| -                                                           | H5N5S <sub>2,3</sub> 2                     |  | 1335.008 | ND       |        |       | 890.341 | ND      |        |       |   | 2412.83 | ND      |       |       |
| -                                                           | H5N5S <sub>2,3</sub> 1S <sub>2,6</sub> 1   |  | 1335.008 | ND       |        |       | 890.341 | ND      |        |       |   | 2458.87 | ND      |       |       |
| 63                                                          | H5N5S <sub>2,6</sub> 2                     |  | 1335.008 | 1335.016 | 0.008  | 5.99  | 890.341 | 890.340 | -0.001 | -1.24 |   | 2504.91 | ND      |       |       |
| 64                                                          | H4N5F1S <sub>2,6</sub> 2                   |  | 1327.011 | 1327.007 | -0.003 | -2.63 | 885.010 | 885.008 | -0.001 | -1.59 | X | 2488.91 | 2488.92 | 0.01  | 4.02  |
| 65                                                          | H4N5F1S <sub>2,3</sub> 1S <sub>2,6</sub> 1 |  | 1327.011 | 1327.008 | -0.003 | -2.10 | 885.010 | 885.008 | -0.002 | -1.93 | X | 2442.88 | 2442.87 | -0.01 | -2.46 |
| 66                                                          | H3N6F1S <sub>2,6</sub> 2                   |  | 1347.524 | 1347.516 | -0.008 | -5.98 | 898.685 | 898.682 | -0.003 | -3.14 |   | 2529.95 | 2529.94 | -0.01 | -2.77 |
| 67                                                          | H6N5F1S <sub>2,3</sub> 2                   |  | 1489.063 | ND       |        |       | 993.045 | 993.044 | -0.001 | -1.31 |   | 2720.94 | 2720.95 | 0.01  | 4.04  |
| 68                                                          | H6N5F1S <sub>2,3</sub> 1S <sub>2,6</sub> 1 |  | 1489.063 | ND       |        |       | 993.045 | 993.043 | -0.002 | -1.81 |   | 2766.98 | 2766.98 | -0.01 | -2.53 |
| 69                                                          | H6N5F1S <sub>2,6</sub> 2                   |  | 1489.063 | ND       |        |       | 993.045 | 993.045 | 0.000  | 0.00  |   | 2813.03 | 2813.03 | 0.01  | 2.84  |

Supporting Information –  
Sialic acid linkage differentiation of glycopeptides using capillary electrophoresis – electrospray ionization – mass spectrometry

|    | Tri-sialylated                                                              |  |          |          |       |       |          |          |        |       |  |         |    |  |  |
|----|-----------------------------------------------------------------------------|--|----------|----------|-------|-------|----------|----------|--------|-------|--|---------|----|--|--|
| 70 | H6NS <sub>5</sub> S <sub>2,3</sub> 3                                        |  | 1561.582 | 1561.582 | 0.000 | -0.04 | 1041.391 | 1041.391 | 0.001  | 0.62  |  | 2986.09 | ND |  |  |
| 71 | H6NS <sub>5</sub> S <sub>2,3</sub> 1(2)S <sub>2,6</sub> 2(1)                |  | 1561.582 | 1561.593 | 0.011 | 7.19  | 1041.391 | 1041.391 | 0.000  | 0.42  |  | 2894.01 | ND |  |  |
| 72 | H6NS <sub>5</sub> S <sub>2,3</sub> 1(1)S <sub>2,6</sub> 2(2)                |  | 1561.582 | ND       |       |       | 1041.391 | 1041.389 | -0.002 | -2.17 |  | 2940.05 | ND |  |  |
| -  | H6NS <sub>5</sub> S <sub>2,6</sub> 3                                        |  | 1561.582 | ND       |       |       | 1041.391 | ND       |        |       |  | 2847.97 | ND |  |  |
| 73 | H6NS <sub>5</sub> F <sub>1</sub> S <sub>2,3</sub> 3                         |  | 1634.611 | 1634.618 | 0.006 | 3.90  | 1090.077 | 1090.077 | 0.000  | -0.02 |  | 3132.15 | ND |  |  |
| 74 | H6NS <sub>5</sub> F <sub>1</sub> S <sub>2,3</sub> 2(1)S <sub>2,6</sub> 1(2) |  | 1634.611 | 1634.620 | 0.009 | 5.68  | 1090.077 | 1090.076 | -0.001 | -0.58 |  | 3040.07 | ND |  |  |
| 75 | H6NS <sub>5</sub> F <sub>1</sub> S <sub>2,3</sub> 2(2)S <sub>2,6</sub> 1(1) |  | 1634.611 | 1634.622 | 0.011 | 6.84  | 1090.077 | 1090.076 | -0.001 | -0.58 |  | 3086.11 | ND |  |  |
| -  | H6NS <sub>5</sub> F <sub>1</sub> S <sub>2,6</sub> 3                         |  | 1634.611 | ND       |       |       | 1090.077 | ND       |        |       |  | 2994.03 | ND |  |  |

\* Glycan compositions are given in terms of number of hexoses (H), N-acetylglucosamines (N), fucoses (F) and sialic acids (S).

X confirmed with MS2 and ND is not detected

Selected mass is used for the MS2 confirmation



**Table S-2. Preparation of buffers at 50 mM ionic strength and applied voltages for the conventional CE method.** The preparation of the buffers can be found in the article by Henchoz *et al.*<sup>3</sup>

| Buffer composition                     |                        | Theoretical pH | Measured pH | Buffer capacity | Applied voltage |
|----------------------------------------|------------------------|----------------|-------------|-----------------|-----------------|
| Buffered species (mM)                  | Buffering species (mM) | (25°C)         | (25°C)      | (mM / pH unit)  | (kV)            |
| H <sub>3</sub> PO <sub>4</sub> (220.5) | NaOH (11)              | 1.5            | 1.495       | 178.6           | 3.5             |
| H <sub>3</sub> PO <sub>4</sub> (103.9) | NaOH (37.7)            | 2.0            | 1.988       | 89.3            | 5.0             |
| H <sub>3</sub> PO <sub>4</sub> (67.0)  | NaOH (46.1)            | 2.5            | 2.502       | 38.4            | 6.0             |
| HCOOH (278.9)                          | NaOH (48.8)            | 3.0            | 2.965       | 105.1           | 6.0             |
| HCOOH (122.4)                          | NaOH (49.6)            | 3.5            | 3.483       | 72.7            | 6.5             |
| HCOOH (72.9)                           | NaOH (49.9)            | 4.0            | 4.009       | 37.3            | 6.5             |
| CH <sub>3</sub> COOH (123.0)           | NaOH (50)              | 4.5            | 4.500       | 72.3            | 8.0             |
| CH <sub>3</sub> COOH (73.1)            | NaOH (50)              | 5.0            | 4.992       | 37.3            | 8.0             |
| CH <sub>3</sub> COOH (57.3)            | NaOH (50)              | 5.5            | 5.461       | 14.7            | 8.0             |
| MES (104.7)                            | NaOH (50)              | 6.0            | 5.991       | 63.0            | 8.0             |
| MES (67.3)                             | NaOH (50)              | 6.5            | 6.423       | 30.1            | 8.0             |
| MOPS (114.0)                           | NaOH (50)              | 7.0            | 6.978       | 39.3            | 8.0             |
| MOPS (70.2)                            | NaOH (50)              | 7.5            | 7.470       | 15.8            | 8.0             |
| MOPS (56.4)                            | NaOH (50)              | 8.0            | 7.934       | 5.4             | 8.0             |
| tricine (68.1)                         | NaOH (50)              | 8.5            | 8.472       | 31.1            | 8.0             |
| tricine (55.7)                         | NaOH (50)              | 9.0            | 8.928       | 11.8            | 8.0             |
| CHES (75.4)                            | NaOH (50)              | 9.5            | 9.613       | 53.6            | 8.0             |
| CHES (57.9)                            | NaOH (49.9)            | 10.0           | 10.077      | 24.0            | 8.0             |
| CHES (52.1)                            | NaOH (49.6)            | 10.5           | 10.480      | 9.5             | 8.0             |
| H <sub>3</sub> PO <sub>4</sub> (14.7)  | NaOH (32.2)            | 11.0           | 11.072      | 6.4             | 8.0             |
| H <sub>3</sub> PO <sub>4</sub> (12.0)  | NaOH (31.3)            | 11.5           | 11.527      | 15.5            | 8.0             |
| H <sub>3</sub> PO <sub>4</sub> (8.1)   | NaOH (33)              | 12.0           | 11.962      | 35.4            | 6.0             |

**Table S-3. Preparation of buffers at 50 mM ionic strength and applied voltages for the IS-CE method.** The preparation of the buffers can be found in the article by Henchoz *et al.*<sup>3</sup>

| Buffer composition                     |                        | Theoretical pH | Measured pH | Buffer capacity | Applied voltage |
|----------------------------------------|------------------------|----------------|-------------|-----------------|-----------------|
| Buffered species (mM)                  | Buffering species (mM) | (25°C)         | (25°C)      | (mM / pH unit)  | (kV)            |
| H <sub>3</sub> PO <sub>4</sub> (41.2)  | NaOH (45.6)            | 6.0            | 5.987       | 9.5             | 8.0             |
| H <sub>3</sub> PO <sub>4</sub> (103.9) | NaOH (37.7)            | 2.0            | 1.988       | 89.3            | 5.0             |

## S-7 SUPPLEMENTARY INFORMATION – FIGURES S-1 – S-10

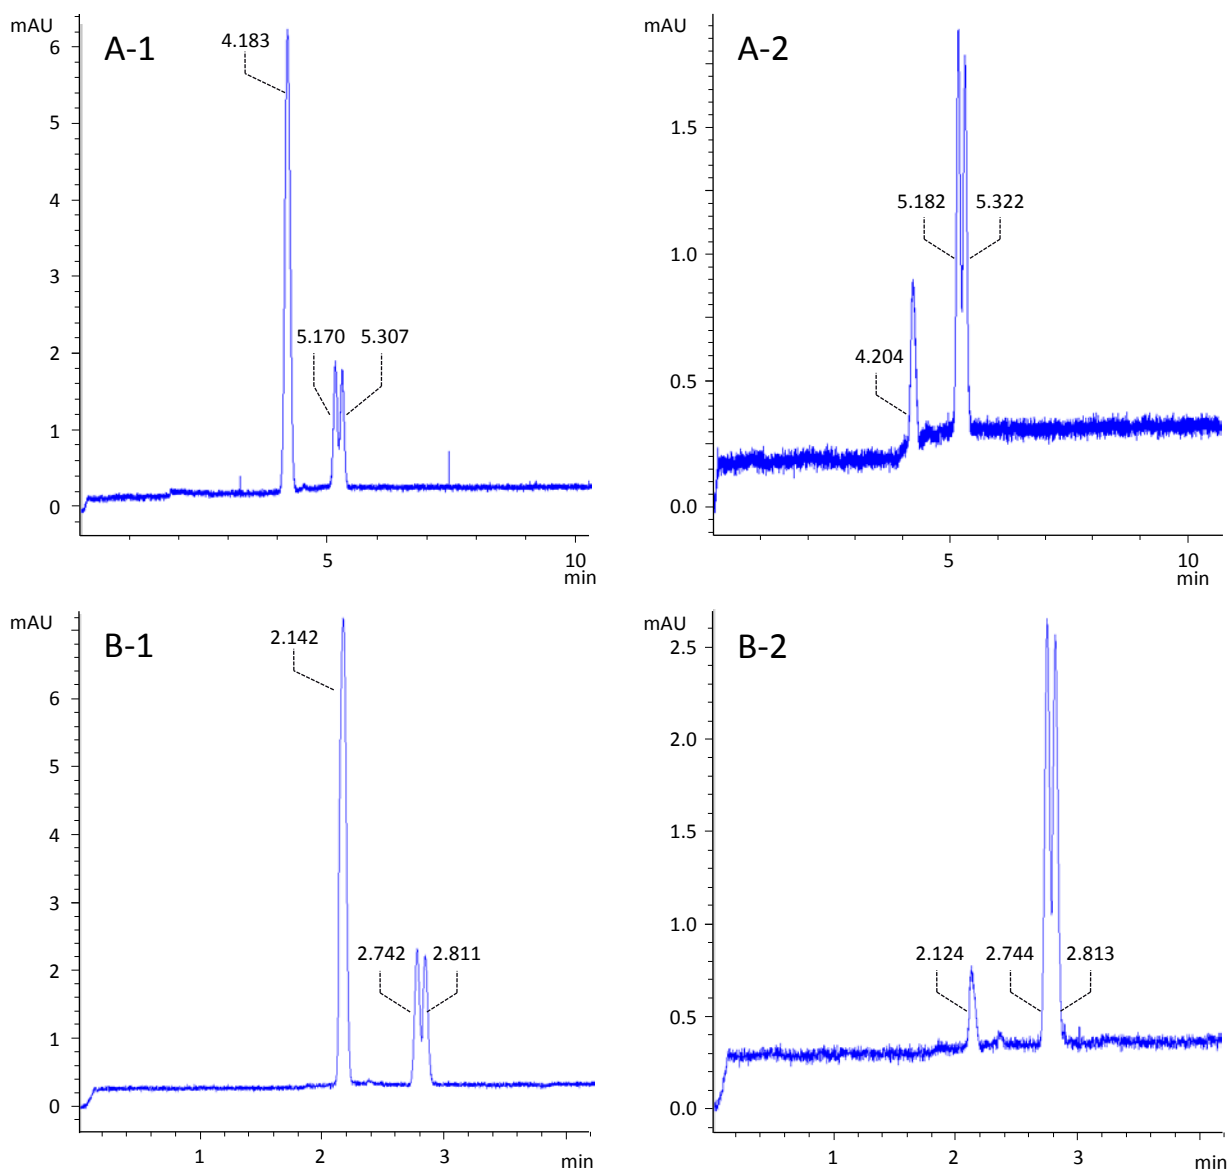

**Figure S-1. Electropherograms obtained with the IS-CE approach. (A-1)**  $\alpha$ 2,3-sialyllactose,  $\alpha$ 2,6-sialyllactose, and neutral marker at pH 6.0; **(A-2)**  $\alpha$ 2,3-sialyllactose and  $\alpha$ 2,6-sialyllactose (no neutral marker) at pH 6.0; **(B-1)**  $\alpha$ 2,3-sialyllactose,  $\alpha$ 2,6-sialyllactose, and neutral marker at pH 2.0; **(B-2)**  $\alpha$ 2,3-sialyllactose and  $\alpha$ 2,6-sialyllactose (no neutral marker) at pH 2.0.

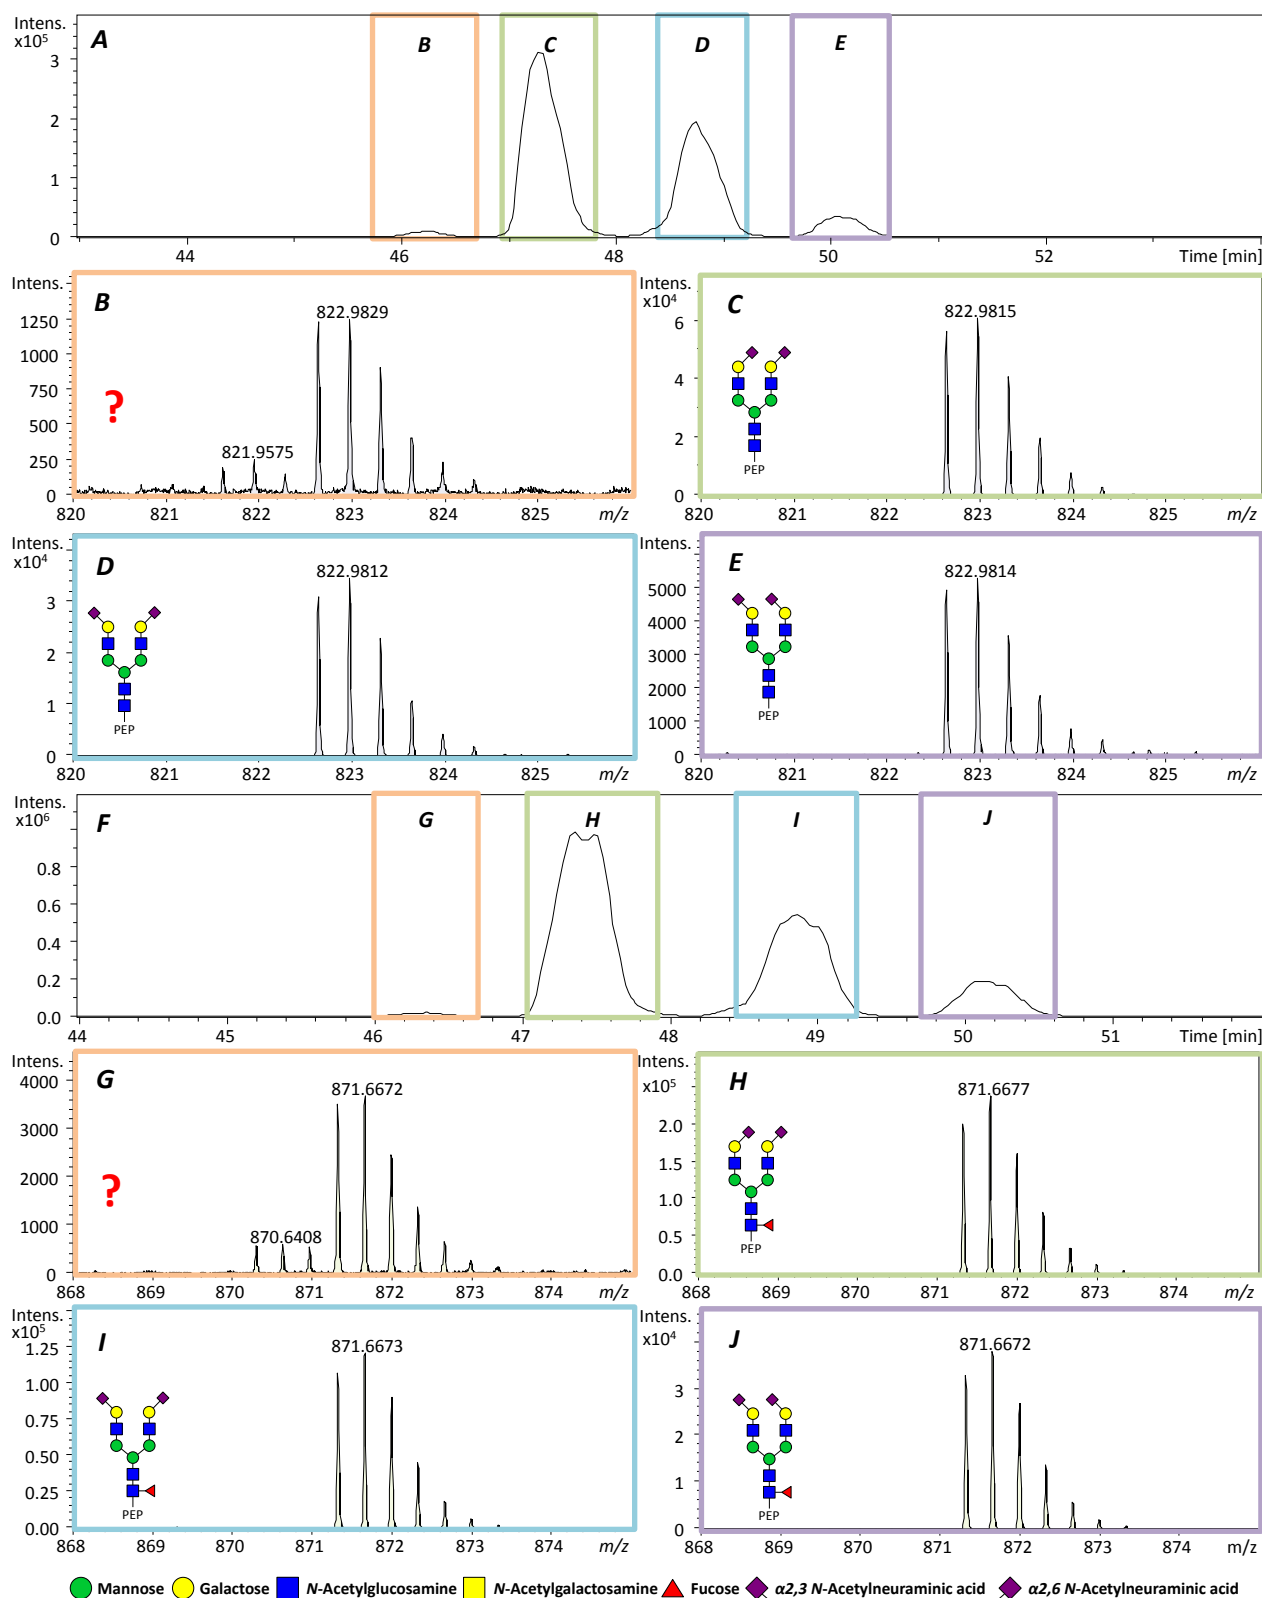

**Figure S-2. Isotopic pattern of di-sialylated tryptic glycopeptides at glycosylation sites N<sub>69</sub> from PSA analysed with CE-ESI-MS.** The extracted ion electropherograms of H5N4S2 (A) and H5N4F1S2 (F). Isotopic pattern of an unassigned glycopeptide (B), H5N4S<sub>2,6</sub>2 (C), H5N4S<sub>2,6</sub>S<sub>2,3</sub> (D), H5N4S<sub>2,3</sub>2 (E), an unassigned glycopeptide (G), H5N4F1S<sub>2,6</sub>2 (H), H4N5F1S<sub>2,6</sub>S<sub>2,3</sub> (I) and H5N4F1S<sub>2,3</sub>2 (J).

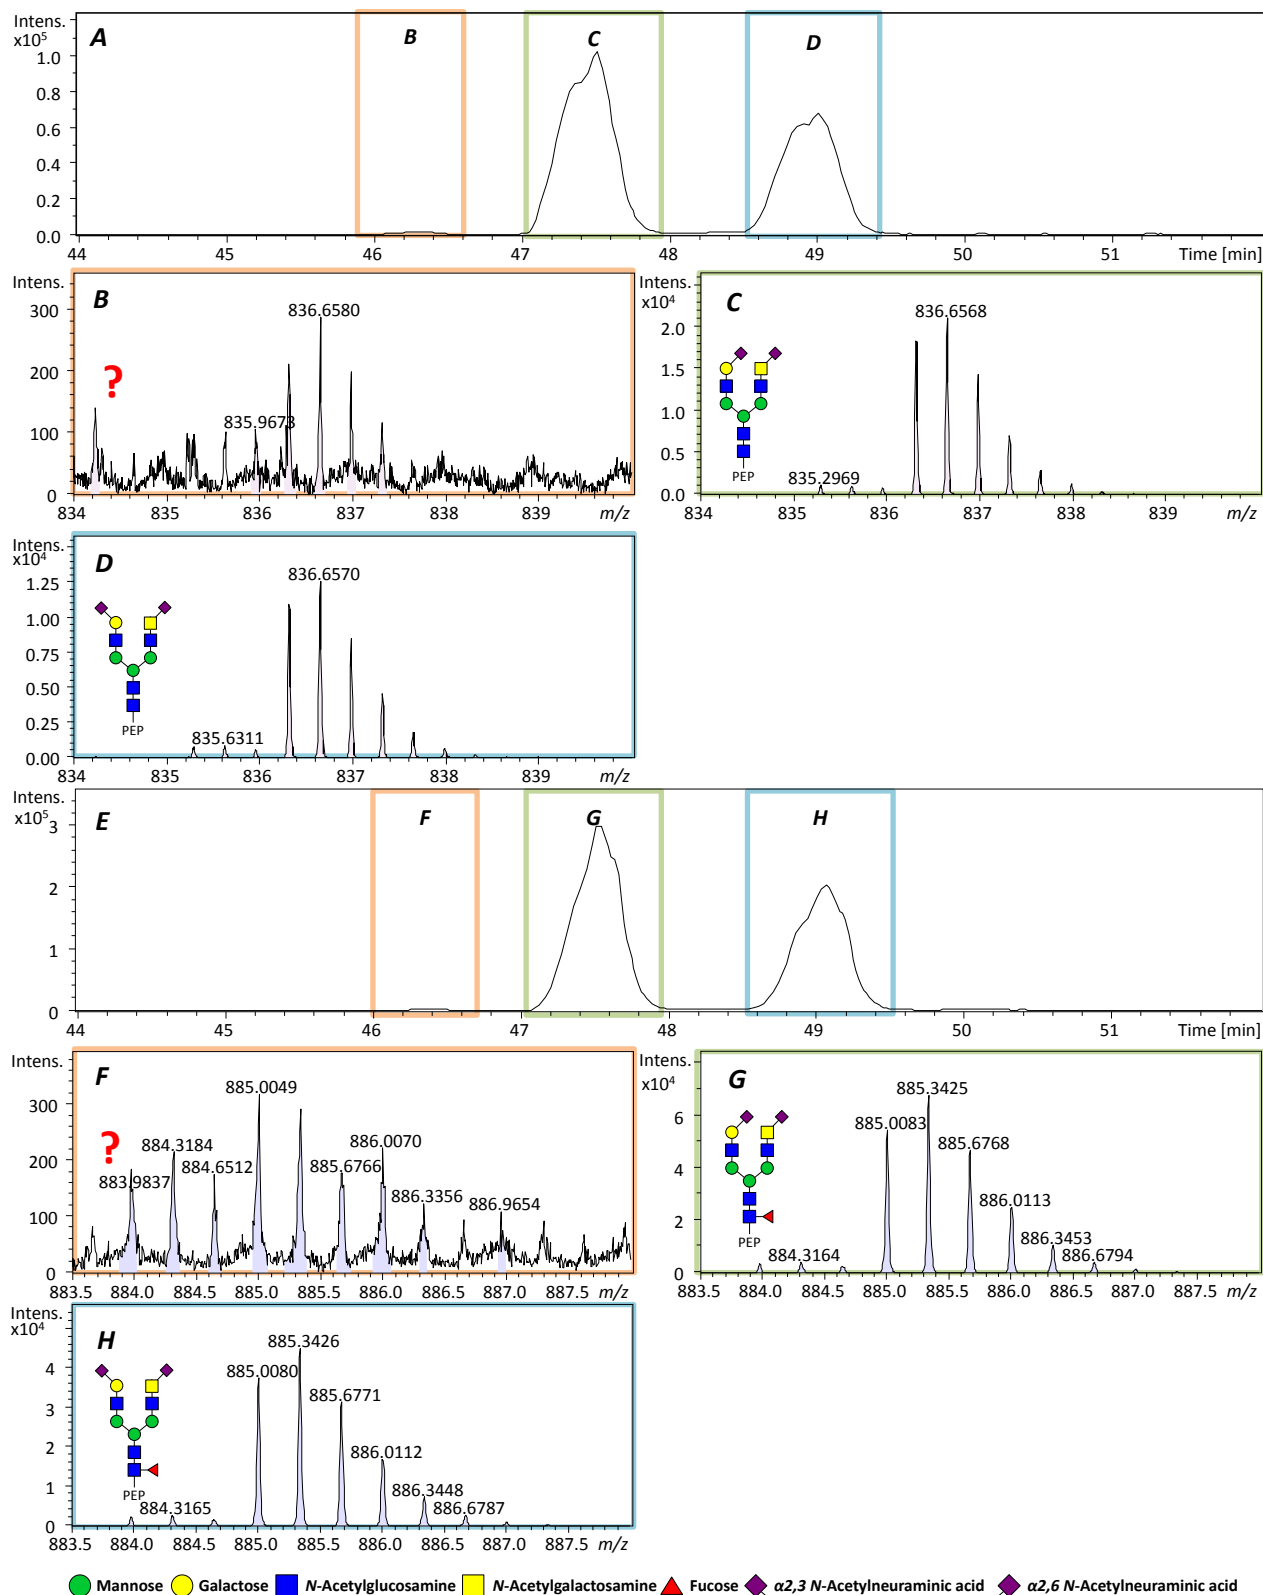

**Figure S-3.** Isotopic pattern of di-sialylated tryptic glycopeptides at glycosylation sites  $N_{69}$  from PSA analysed with CE-ESI-MS. The extracted ion electropherograms of H4N5S2 (A) and H4N5F1S2 (E). Isotopic pattern of an unassigned glycopeptide (B), H4N5S<sub>2,6</sub>-2 (C), H4N5S<sub>2,6</sub>S<sub>2,3</sub> (D), an unassigned glycopeptide (F), H5N4F1S<sub>2,6</sub>-2 (G) and H4N5F1S<sub>2,6</sub>S<sub>2,3</sub> (H).

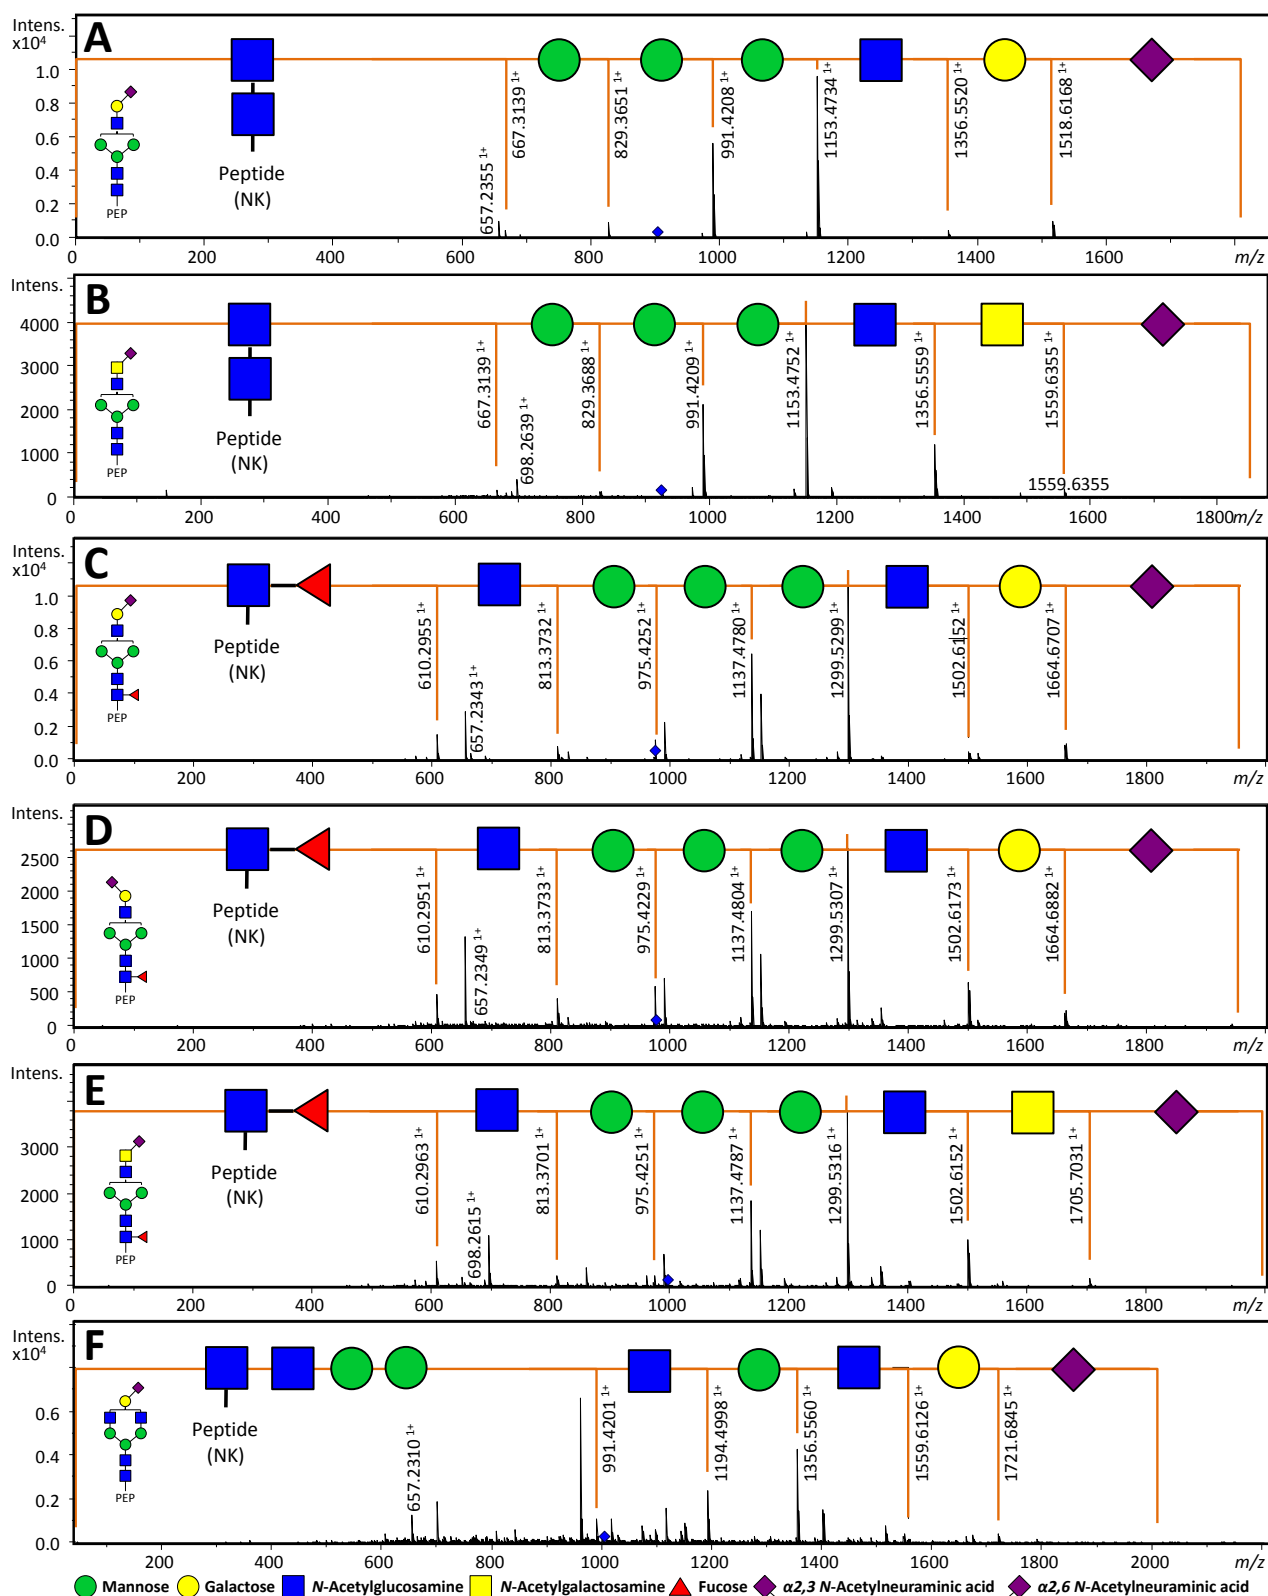

**Figure S-4. Fragmentation spectra of mono-sialylated tryptic glycopeptides at glycosylation sites N<sub>69</sub> from PSA analysed with CE-ESI-MS.** The following precursor ions were fragmented (A) 905.3536<sup>2+</sup> (H4N3S<sub>2,6</sub>1), (B) 925.8672<sup>2+</sup> (H3N4S<sub>2,6</sub>1) (C) 977.4336<sup>2+</sup> (H4N3F1S<sub>2,6</sub>1), (D) 978.3825<sup>2+</sup> (H4N3F1S<sub>2,3</sub>1), (E) 999.0279<sup>2+</sup> (H3N4F1S<sub>2,6</sub>1) and (F) 1006.8925<sup>2+</sup> (H4N4F1S<sub>2,6</sub>1). Blue diamond illustrates the precursor ion, PEP illustrates the tryptic peptide sequence NK.

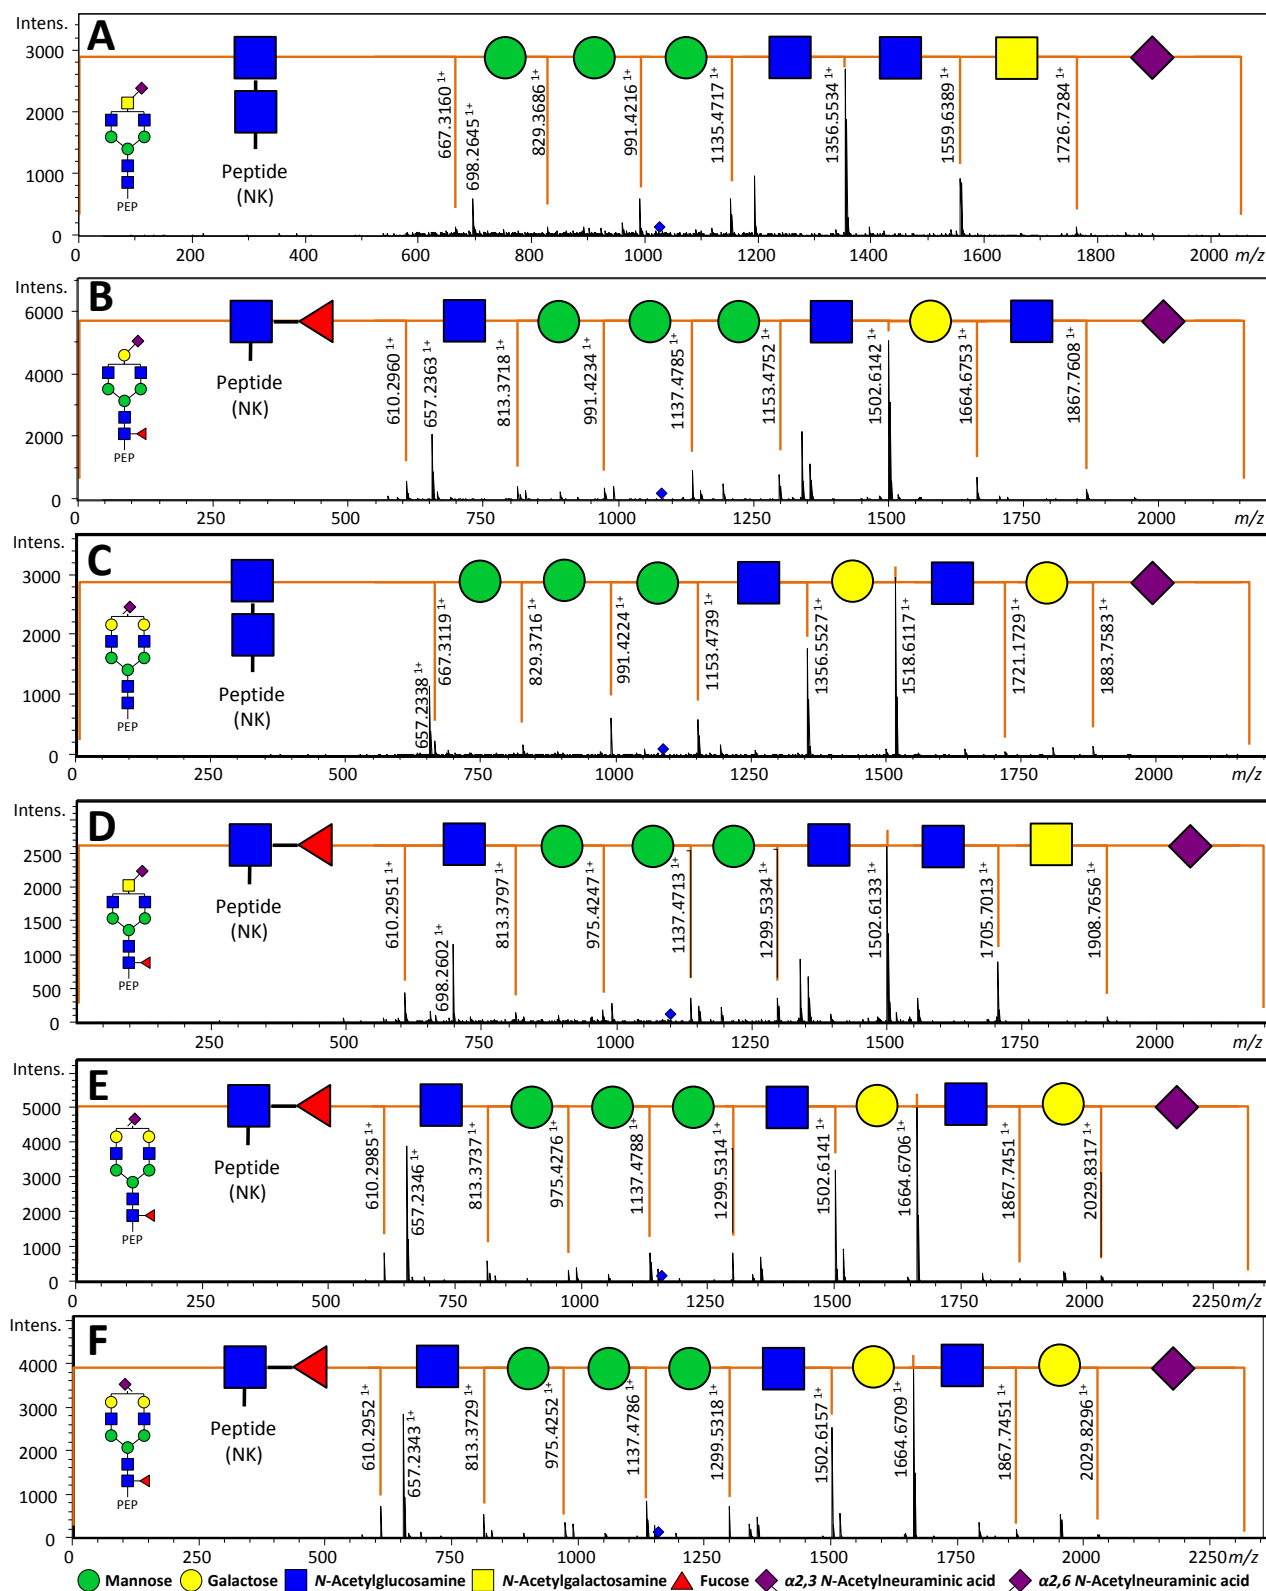

**Figure S-5. Fragmentation spectra of mono-sialylated tryptic glycopeptides at glycosylation sites  $N_{69}$  from PSA analysed with CE-ESI-MS.** The following precursor ions were fragmented (A) 1027.4062<sup>2+</sup> (H3N5S<sub>2,6</sub>\_1), (B) 1080.2912<sup>2+</sup> (H4N4F1S<sub>2,6</sub>\_1) (C) 1088.1100<sup>2+</sup> (H5N4S<sub>2,6</sub>\_1), (D) 1100.4350<sup>2+</sup> (H4N3F1S<sub>2,3</sub>\_1), (E) 1161.2845<sup>2+</sup> (H3N4F1S<sub>2,6</sub>\_1) and (F) 1161.2845<sup>2+</sup> (H4N4F1S<sub>2,6</sub>\_1). Blue diamond illustrates the precursor ion, PEP illustrates the tryptic peptide sequence NK.

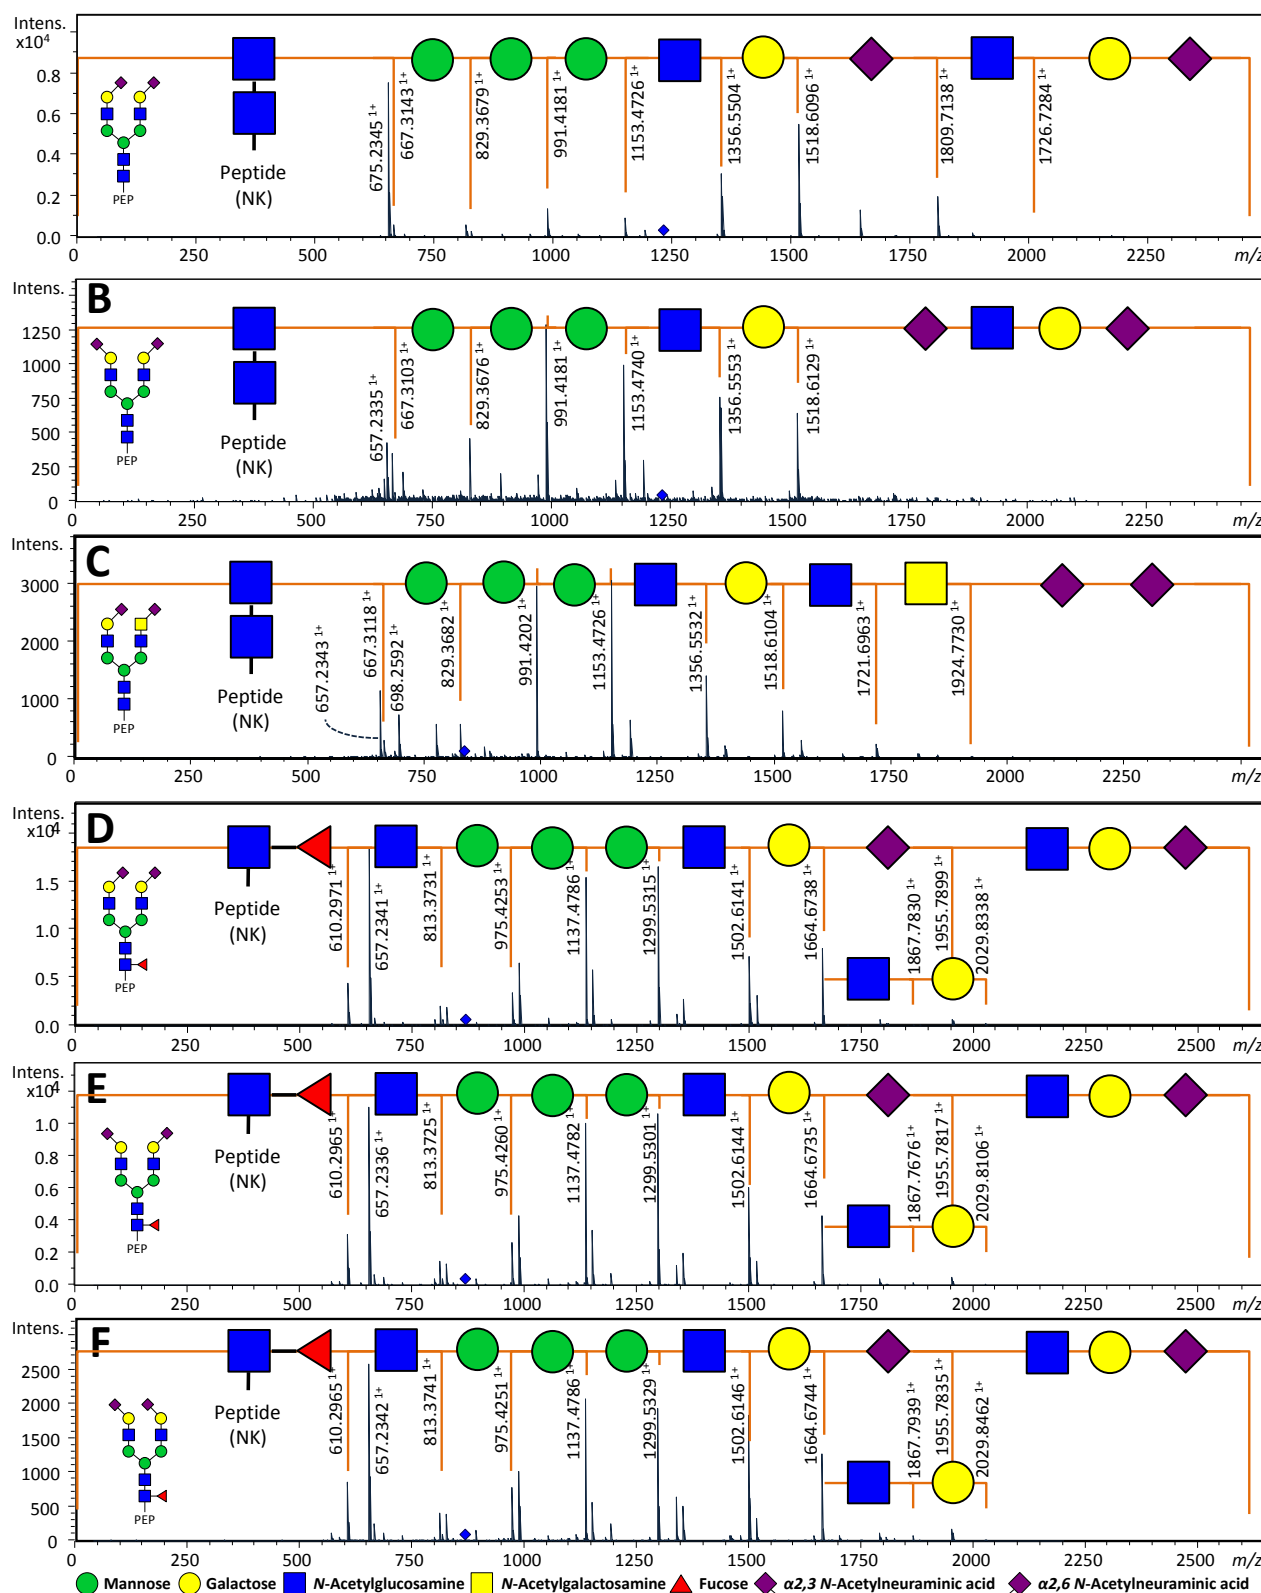

**Figure S-6. Fragmentation spectra of di-sialylated tryptic glycopeptides at glycosylation sites N<sub>69</sub> from PSA analysed with CE-ESI-MS.** The following precursor ions were fragmented (A) 1233.9676<sup>2+</sup> (H5N4S<sub>2,6</sub>), (B) 1233.9677<sup>2+</sup> (H5N4S<sub>2,3</sub>1S<sub>2,6</sub>1) (C) 836.6300<sup>3+</sup> (H4N5S<sub>2,6</sub>), (D) 871.4509<sup>3+</sup> (H5N4F1S<sub>2,6</sub>), (E) 871.6134<sup>3+</sup> (H5N4F1S<sub>2,3</sub>1S<sub>2,6</sub>1) and (F) 871.6515<sup>3+</sup> (H5N4F1S<sub>2,3</sub>2). Blue diamond illustrates the precursor ion, PEP illustrates the tryptic peptide sequence NK.

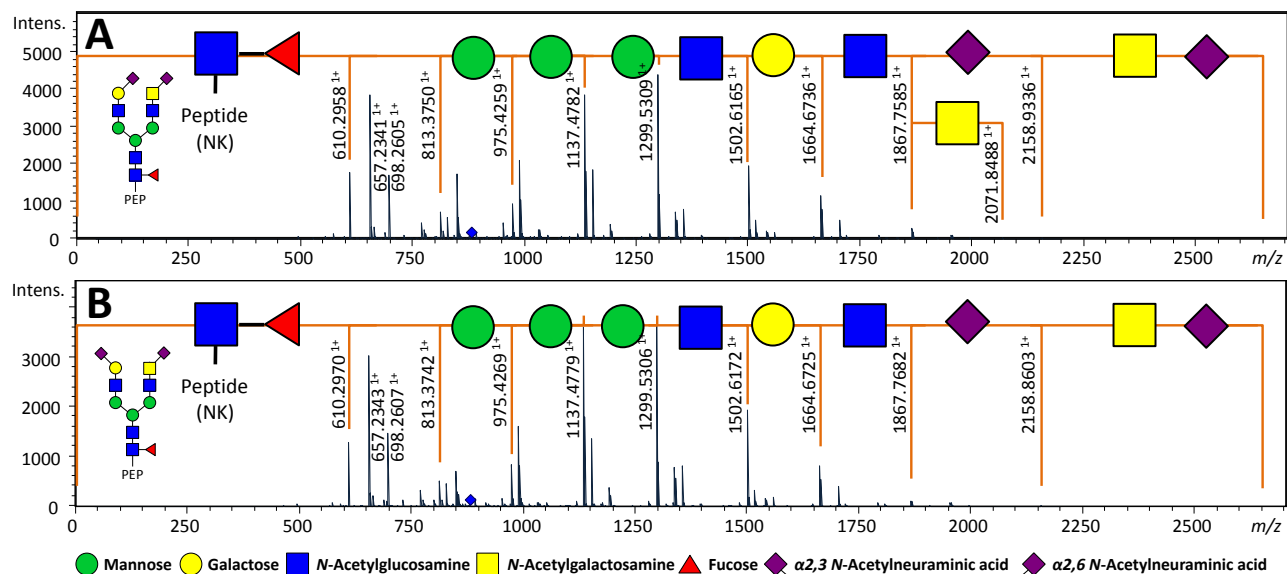

**Figure S-7. Fragmentation spectra of di-sialylated tryptic glycopeptides at glycosylation sites N<sub>69</sub> from PSA analysed with CE-ESI-MS.** The following precursor ions were fragmented **(A)** 885.3696<sup>3+</sup> (H4N5F1S<sub>2,6</sub><sub>2</sub>) and **(B)** 885.3104<sup>3+</sup> (H4N5F1S<sub>2,3</sub><sub>1</sub>S<sub>2,6</sub><sub>1</sub>). Blue diamond illustrates the precursor ion, PEP illustrates the tryptic peptide sequence NK.



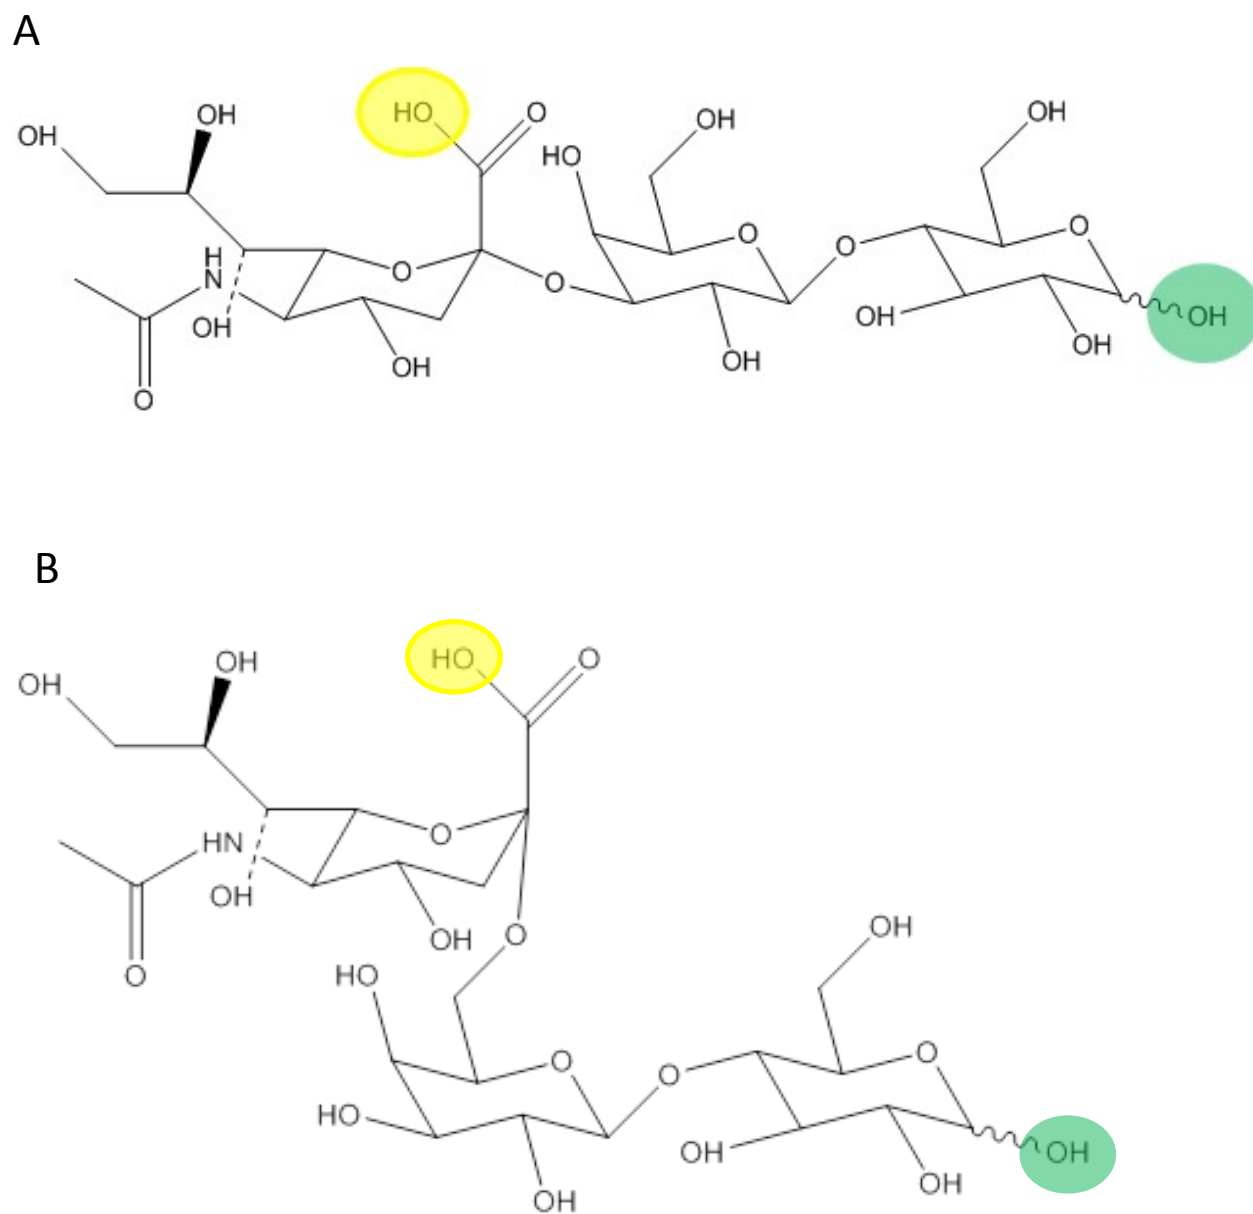

**Figure S- 8.** Chemical structure of **(A)**  $\alpha$ 2,3 sialyllactose and **(B)**  $\alpha$ 2,6 sialyllactose

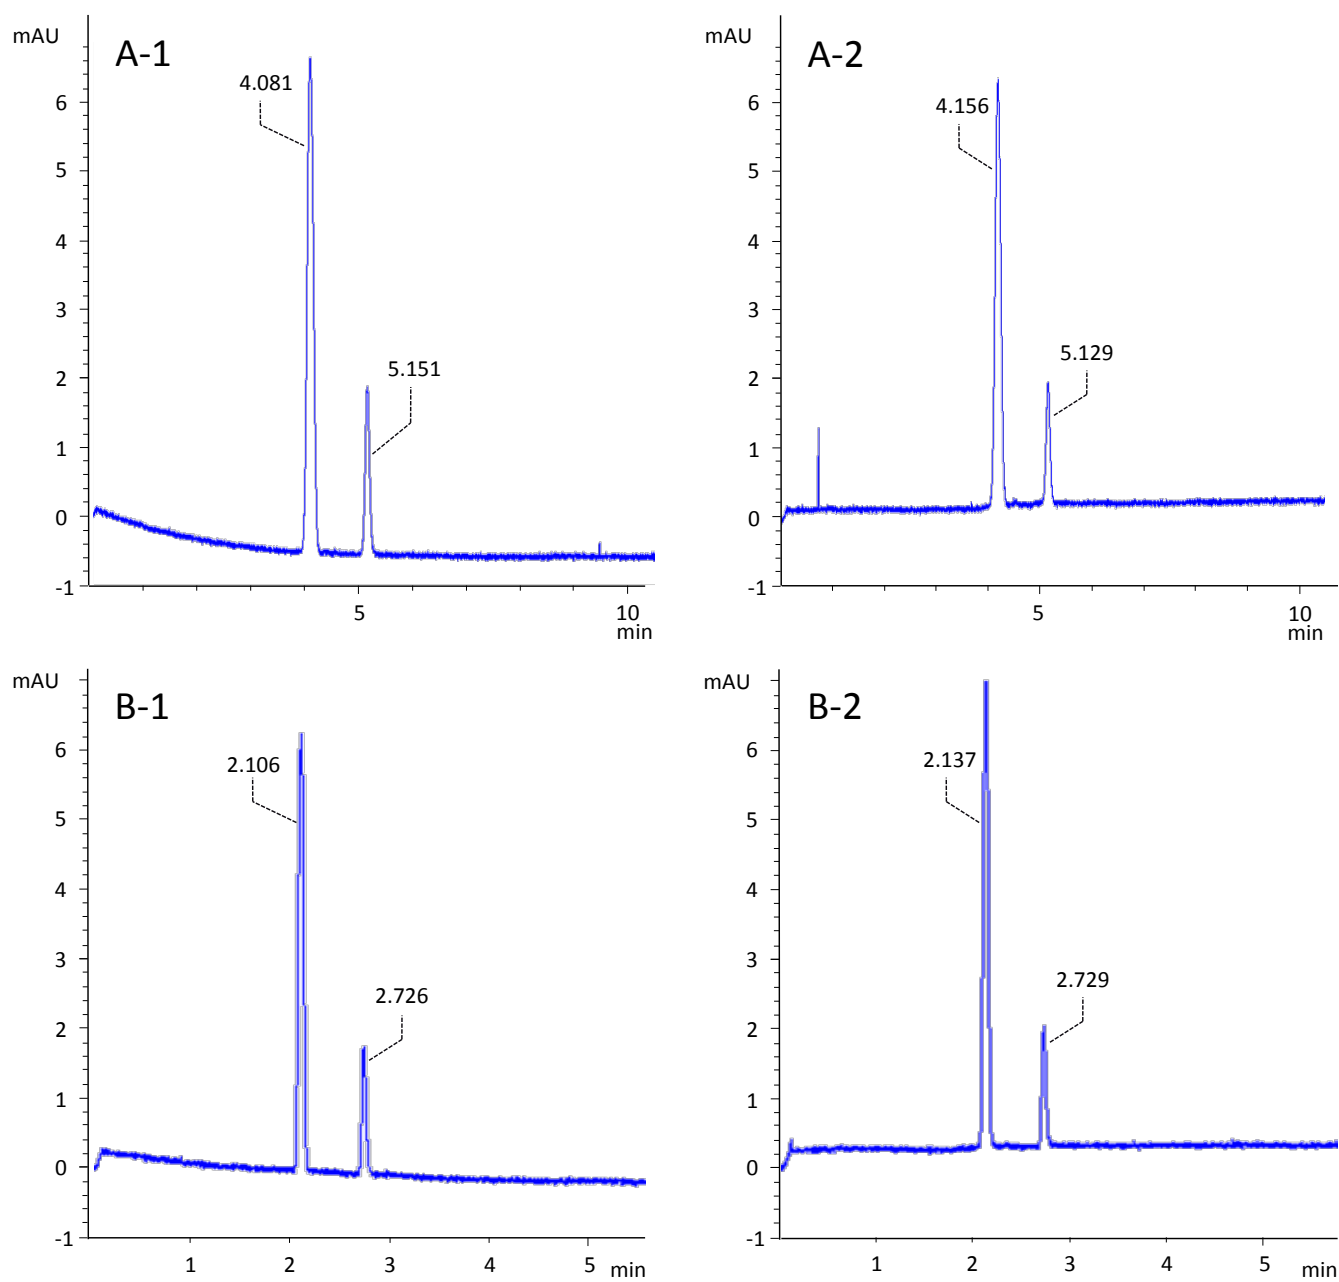

**Figure S-9. Electropherograms obtained with the conventional CE approach. (A-1)  $\alpha$ 2,3-sialyllactose and (A-2)  $\alpha$ 2,6-sialyllactose with a neutral marker at pH 6.0; (B-1)  $\alpha$ 2,3-sialyllactose and (B-2)  $\alpha$ 2,6-sialyllactose with a neutral marker at pH 2.0.**

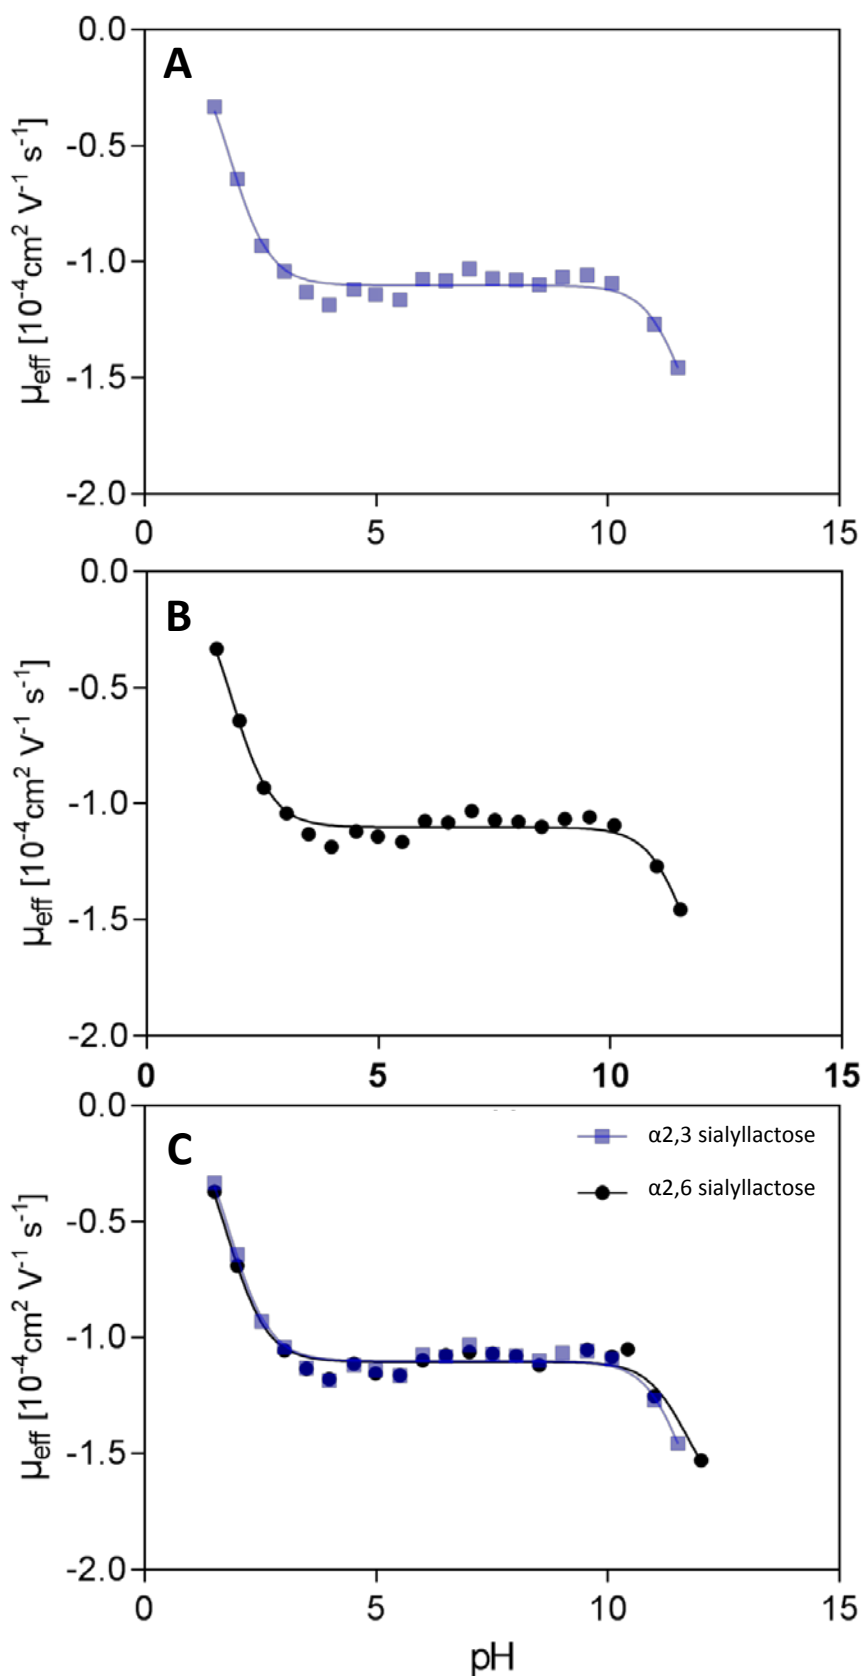

**Figure S-10.** Relationship between  $\mu_{\text{eff}}$  and pH for **(A)**  $\alpha 2,3$  sialyllactose, **(B)**  $\alpha 2,6$  sialyllactose and **(C)** an overlay of these two compounds.

## S-8 REFERENCES

- (1) Geiser, L.; Henchoz, Y.; Galland, A.; Carrupt, P.-A.; Veuthey, J.-L. *J. Sep. Sci.* **2005**, *28*, 2374-2380.
- (2) Fuguet, E.; Ràfols, C.; Bosch, E.; Rosés, M. *Chem. Biodiversity* **2009**, *6*, 1822-1827.
- (3) Henchoz, Y.; Schappler, J.; Geiser, L.; Prat, J.; Carrupt, P.-A.; Veuthey, J.-L. *Anal. Bioanal. Chem.* **2007**, *389*, 1869-1878.
